# Supplementary material for: One-fifth of the world's population at high risk from climate-related hazards
Source: Research Square preprint supplement (doi:10.21203/rs.3.rs-5302969/v2), 2025-01-29
Supplement: Supplementary file 1 [file c02772d855254b172424c818.docx]

**Supplementary Information**

**One-fifth of the world’s population at high risk from climate-related hazards**

This Supplementary Information provides additional details to describe the methodology and support our results.

**Defining exposed locations from probabilistic hazard maps**

Figure S1 demonstrates how exposed locations are identified from the hazard data sources. The probabilistic hazard maps depict the maximum intensity of a hazard with a given return period (frequency). The figure shows: (a) the maximum depth of a 100-year return period flood, as depicted by the hazard map data, (b) the area where a flood with a return period of 100 years exceeds 50 cm, (c) the annual frequency of a flood exceeding 50 cm, and d) the area where the annual frequency of a flood exceeding 50cm is *at least* 1%. The area defined as exposed in b and d is equivalent by definition using our approach and includes locations where floods are relatively more intense or more frequent than the thresholds used.

**Figure S1: Defining exposed locations from probabilistic hazard maps**

| **a**  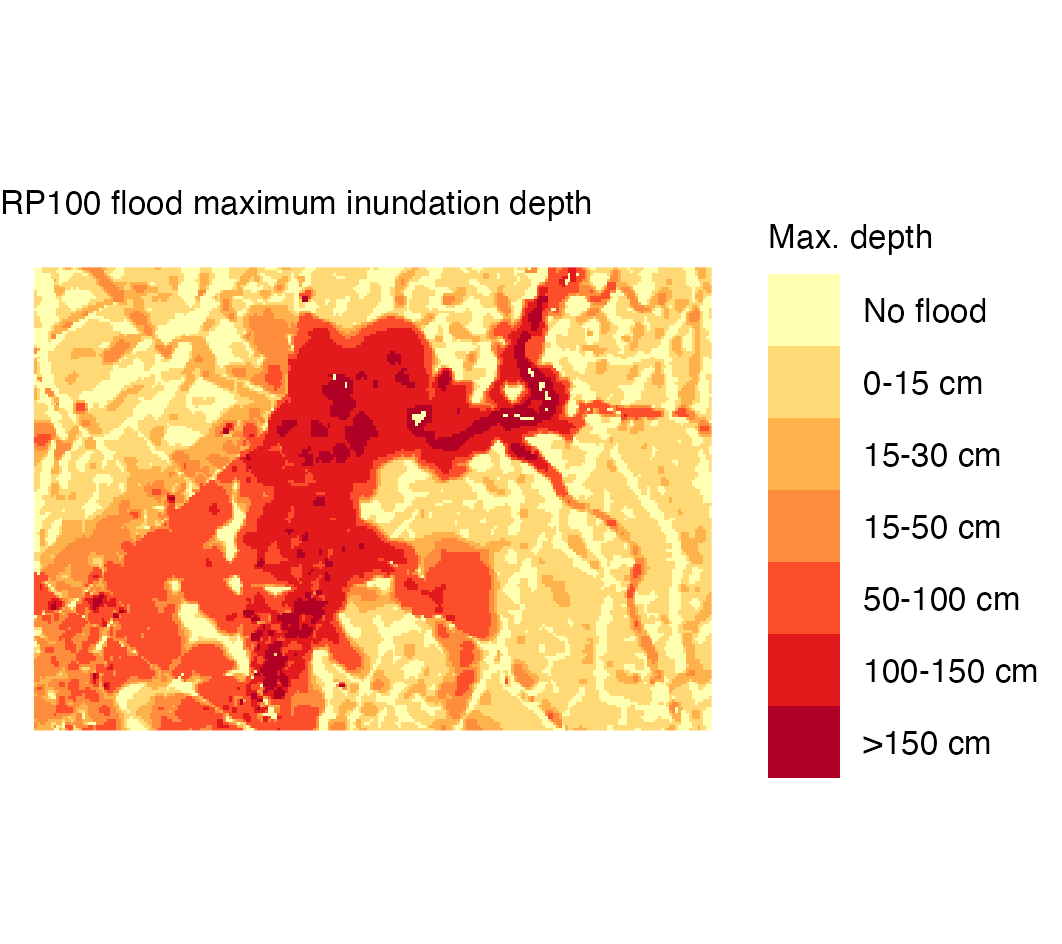 | **b**  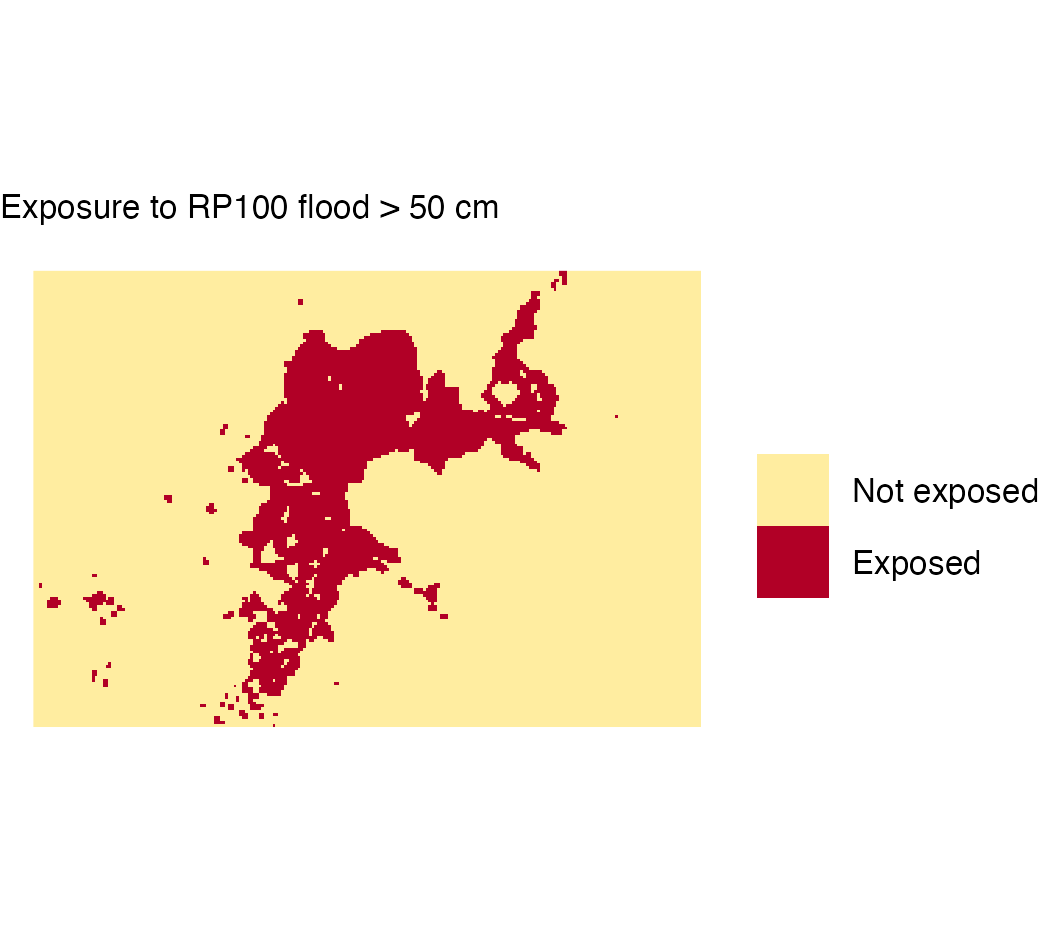 |
| --- | --- |
| **c**  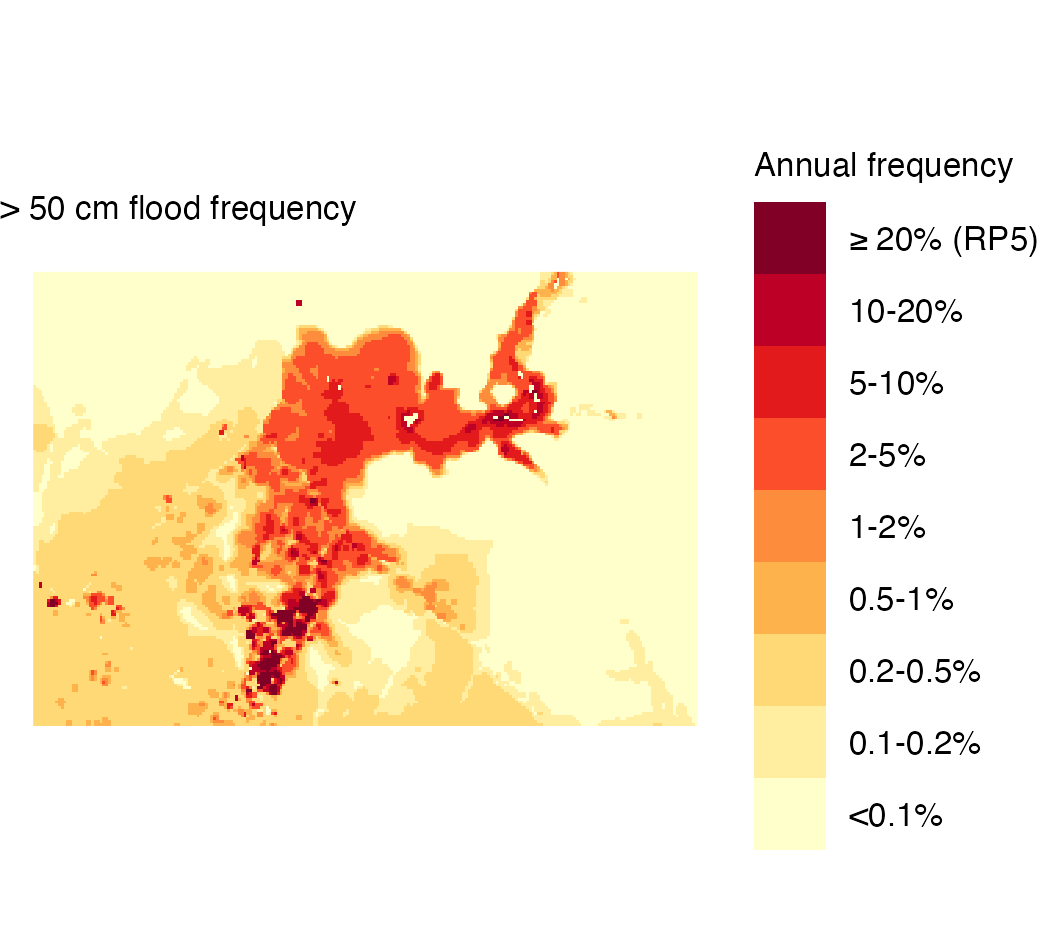 | **d**  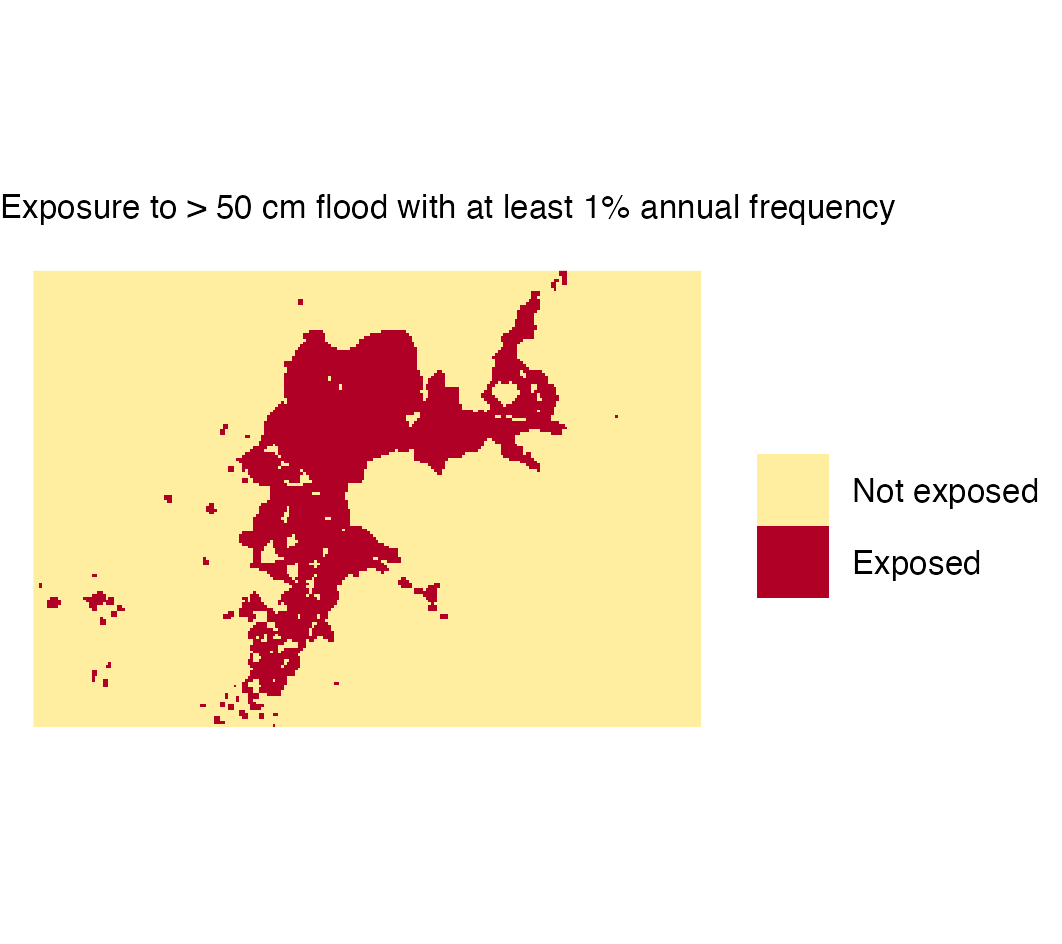 |

**Adjusting estimates of financial account ownership from individual to household level**

Since Findex data is collected at individual level, we adjust estimates to household level to be consistent with other indicators. We require the share of households without access to a financial account or mobile money. We apply an adjustment based on the number of adults in a household and a factor derived from examining countries where data on both household and individual ownership of accounts is available. A constant adjustment factor of 0.6 was found to predict household level access to finance across income quintiles, based on validation against surveys in 11 countries with complete data. The share of households without access is therefore calculated at income quintile level as:

where is the share of households without access to a financial or mobile money account in each quintile (required for the analysis), is the share of individuals (15+) without access, as measured by Findex surveys, and is the average number of individuals (15+) in a household in each quintile, based on GMD surveys. Results from validation in eleven countries where surveys collected individual level data for all household members is shown in Figure S2.

**Figure S2: Findex household level adjustment**

**Merging spatially defined degree of urbanization with survey rural-urban definitions**

Degree of urbanization method (DoU) is a consistent way to classify the exposed population (based on population cluster size and density). However, this classification may not align well with the definition of rural/urban in household surveys and corresponding vulnerability rates. In particular, some countries report rural population shares much higher than those estimated using DoU. Without any adjustment, applying the (lower) urban vulnerability rates to a larger urban population classified by DoU will underestimate the total number of people who are highly vulnerable. Therefore, we reclassify the DoU categories to match population shares in the survey such that the overall vulnerability rate does not change. Figure S3 demonstrates the method.

**Figure S3: Aligning rural and urban definitions**

**
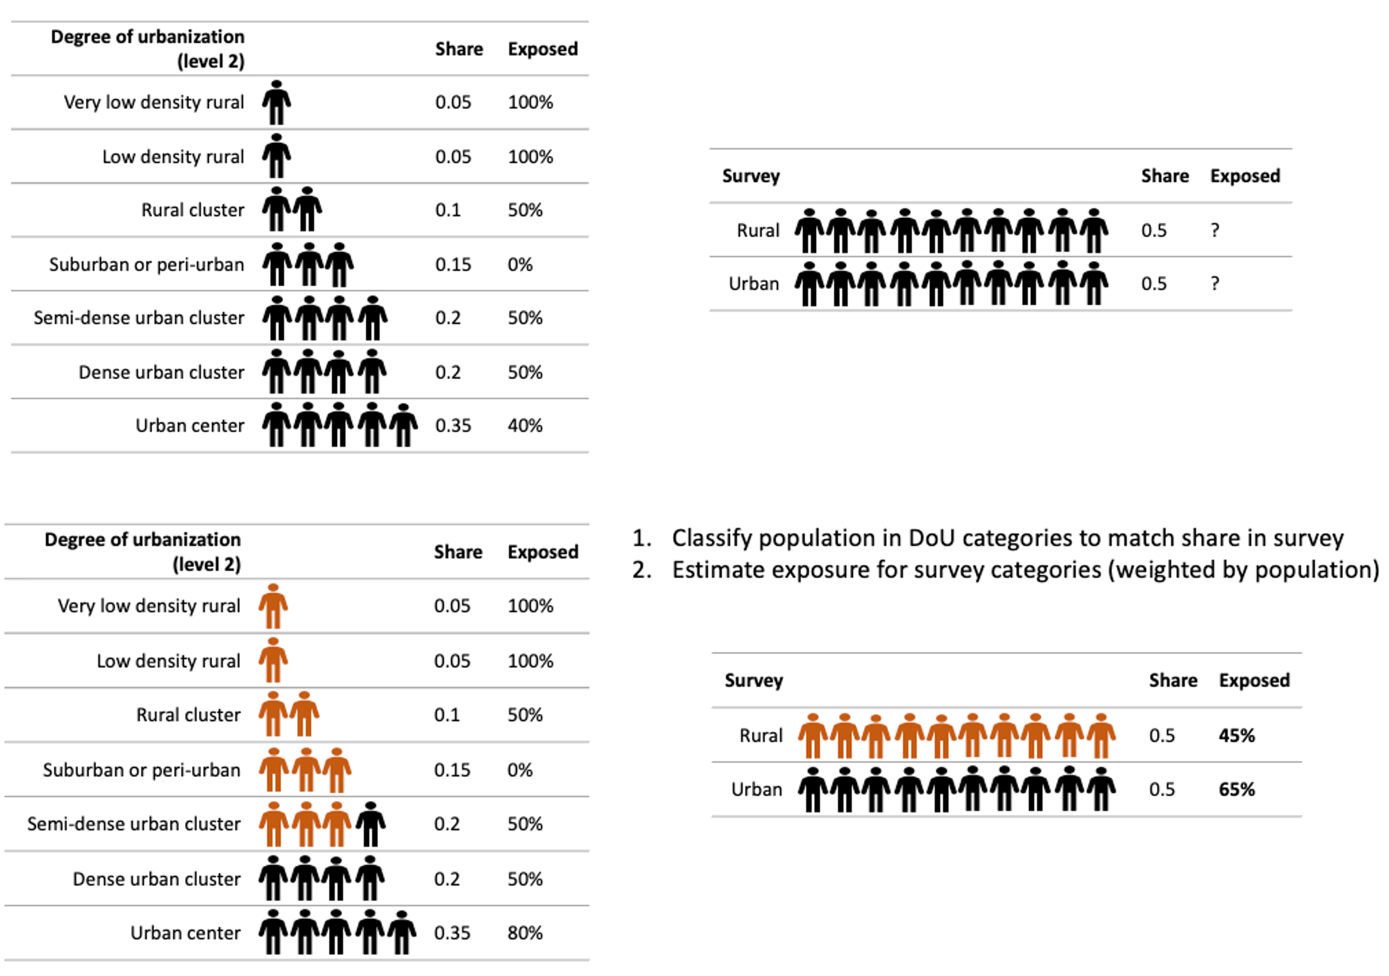
**

The method was validated on data from India, using maps delineating rural and urban areas for the 2011 population census as a benchmark. The population defined as rural using the national definition is known to be significantly larger than that classified by DoU in India. Figure S4 shows results from the validation. The population exposed and poor in each state would be substantially underestimated if we assume DoU aligns with the national classification when merging population exposure and vulnerability estimates. However, the bias is almost completely corrected when using our reclassification method.

**Figure S4: Rural-urban adjustment**

**Robustness to survey data collection period and overlap assumptions**

Table S1 shows estimates of the population at high risk from climate related hazards when restricting the sample to countries with data on all dimensions of vulnerability from within 3 years of both 2010 and 2021.

We also estimate upper and lower bounds by assuming the minimum and maximum possible overlap between the exposed and vulnerable population, rather than assuming that the vulnerable population are just as likely to be exposed as those not vulnerable within a spatial unit (zero correlation). It should be noted that these represent “100% confidence intervals” for one source of uncertainty and therefore do not correspond with typical statistical inference levels. It is unlikely that the extent of overlap approaches the theoretical maximum or minimum based on the empirical evidence available.

The levels and trends of the main results using our preferred specification are robust in all cases.

**Table S1: Sensitivity to survey data collection period and population overlap assumption**

|  | Share of population at high risk (%) | | |
| --- | --- | --- | --- |
|  | 2010 | 2021 | ∆ |
| Main  (full sample, zero correlation) | **35.7** | **19.4** | **-16.3** |
| Countries with recent data  (+/- 3 years, N = 89) | 36.5 | 17.1 | -19.4 |
| Sensitivity to overlap assumption |  |  |  |
| Upper bound  (maximum overlap) | 39.7 | 22.5 | -17.2 |
| Lower bound  (minimum overlap) | 31.7 | 16.1 | -15.6 |

Figure S5 maps the range between these extreme upper and lower bound estimates at subnational level. This represents the maximum possible uncertainty due to the overlap assumption. Due to the mechanics of assuming zero correlation, the range increases where exposure and vulnerability rates approach 50% of the population.

**Figure S5: Range between upper and lower bounds**

**
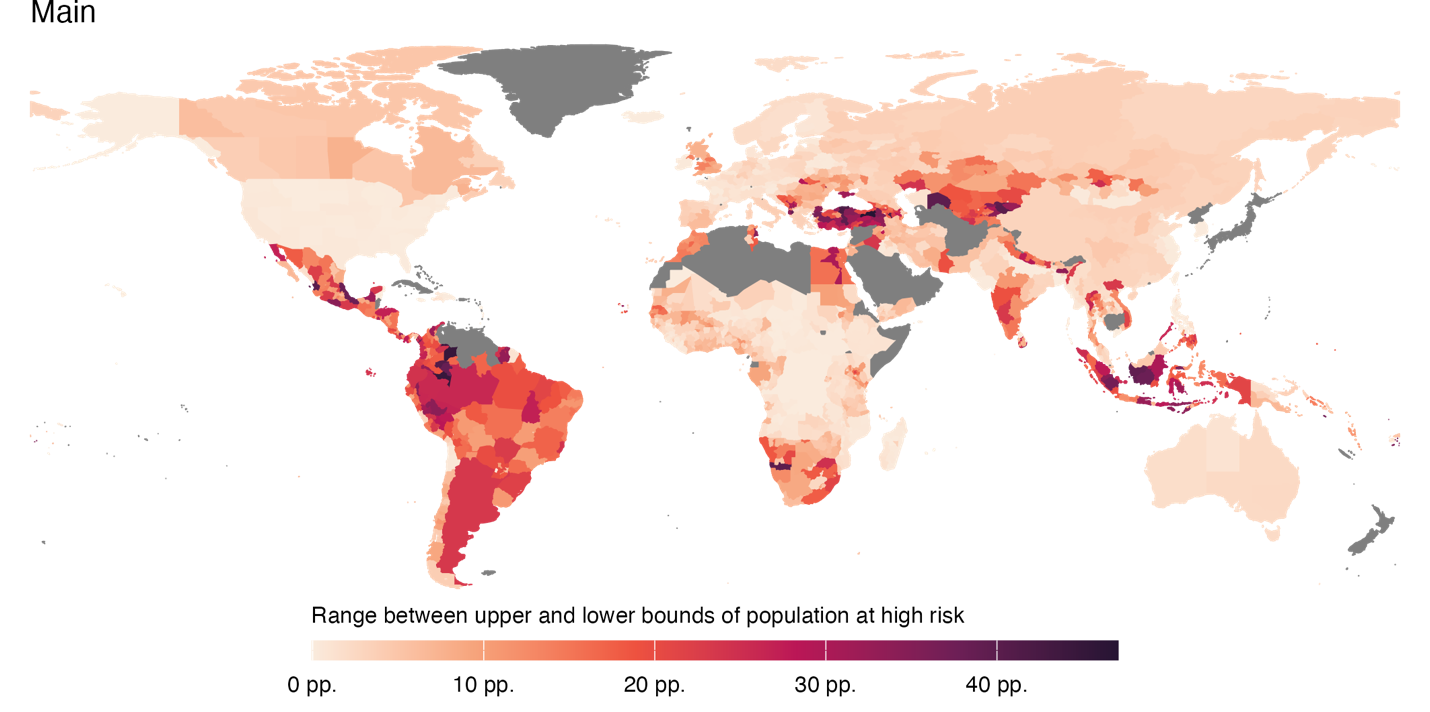
**

**Using alternate hazard thresholds to define exposed locations**

Identifying the who is exposed to climate related hazards (and at high risk) for a population headcount indicator requires selecting thresholds. The choice of thresholds for the indicator is based on prior literature, as discussed in the main paper. Here we estimate results using a wide range of alternate thresholds to explore the sensitivity to primary choice of thresholds. For exposure to multiple hazards, we consider 5 alternate combinations of thresholds as defined in Table S2. These include using either higher and lower intensity thresholds and/or higher frequency thresholds (at least 5% annual frequency).

**Table S2: Alternate multi-hazard thresholds**

| **Threshold scenario** | **Hazard** | **Annual frequency** | **Intensity** |
| --- | --- | --- | --- |
| **Main**  **(used for indicator)** | Agricultural drought | ≥ 1/39 (historical) | > 30% cropland or pasture affected and rural |
| Flood | ≥ 1% | > 0.5 m inundation depth |
| Heatwave | ≥ 1% | > 33°C 5-day mean of daily maximum WBGT |
| Tropical cyclone | ≥ 1% | ≥ Category 2 wind speed |
| **Higher intensity** | Agricultural drought | ≥ 2/39 (historical) | > 50% cropland or pasture affected and rural |
| Flood | ≥ 1% | > 1 m inundation depth |
| Heatwave | ≥ 1% | > 34°C 5-day mean of daily maximum WBGT |
| Tropical cyclone | ≥ 1% | ≥ Category 3 wind speed |
| **Lower intensity** | Agricultural drought | ≥ 1/39 (historical) | > 30% cropland or pasture affected and rural |
| Flood | ≥ 1% | > 0.15 m inundation depth |
| Heatwave | ≥ 1% | > 32°C 5-day mean of daily maximum WBGT |
| Tropical cyclone | ≥ 1% | ≥ Category 1 wind speed |
| **Higher frequency** | Agricultural drought | ≥ 2/39 (historical) | > 30% cropland or pasture affected and rural |
| Flood | ≥ 5% | > 0.5 m inundation depth |
| Heatwave | ≥ 5% | > 33°C 5-day mean of daily maximum WBGT |
| Tropical cyclone | ≥ 5% | ≥ Category 2 wind speed |
| **Higher intensity &**  **higher frequency** | Agricultural drought | ≥ 2/39 (historical) | > 50% cropland or pasture affected and rural |
| Flood | ≥ 5% | > 1 m inundation depth |
| Heatwave | ≥ 5% | > 34°C 5-day mean of daily maximum WBGT |
| Tropical cyclone | ≥ 5% | ≥ Category 3 wind speed |
| **Lower intensity &**  **higher frequency** | Agricultural drought | ≥ 2/39 (historical) | > 30% cropland or pasture affected and rural |
| Flood | ≥ 5% | > 0.15 m inundation depth |
| Heatwave | ≥ 5% | > 32°C 5-day mean of daily maximum WBGT |
| Tropical cyclone | ≥ 5% | ≥ Category 1 wind speed |

Results are summarized in Figures S6, S7 and S8. Using higher thresholds reduces the number of people considered at high risk, as anticipated. However, we find that the relative ranking of regions and countries is insensitive to alternate threshold choices. Figure S8 shows that at country level, the Spearman’s rank correlation coefficient is greater than 0.9 for most comparisons. The analysis suggests our main results highlighting regional inequalities in the the share of population at high risk are robust to using different thresholds to define exposed areas.

**Figure S6: Population at high risk using alternate exposure thresholds (2021)**

| **a**  **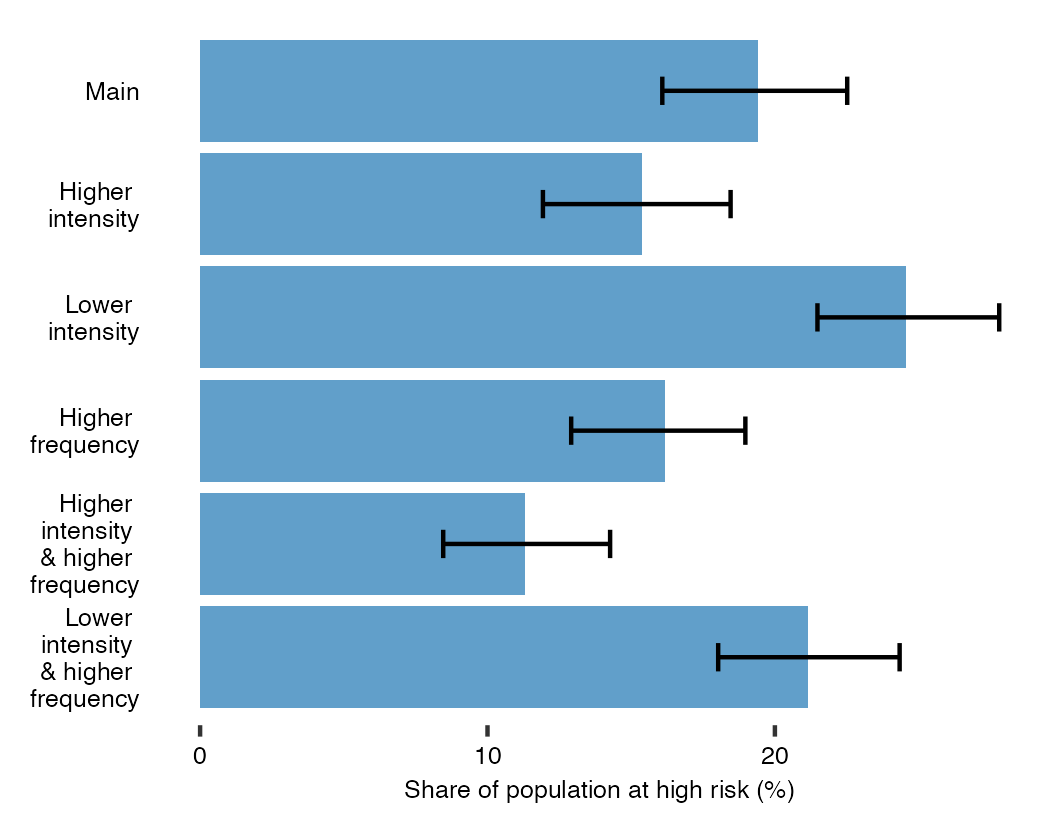** |
| --- |
| **b**  **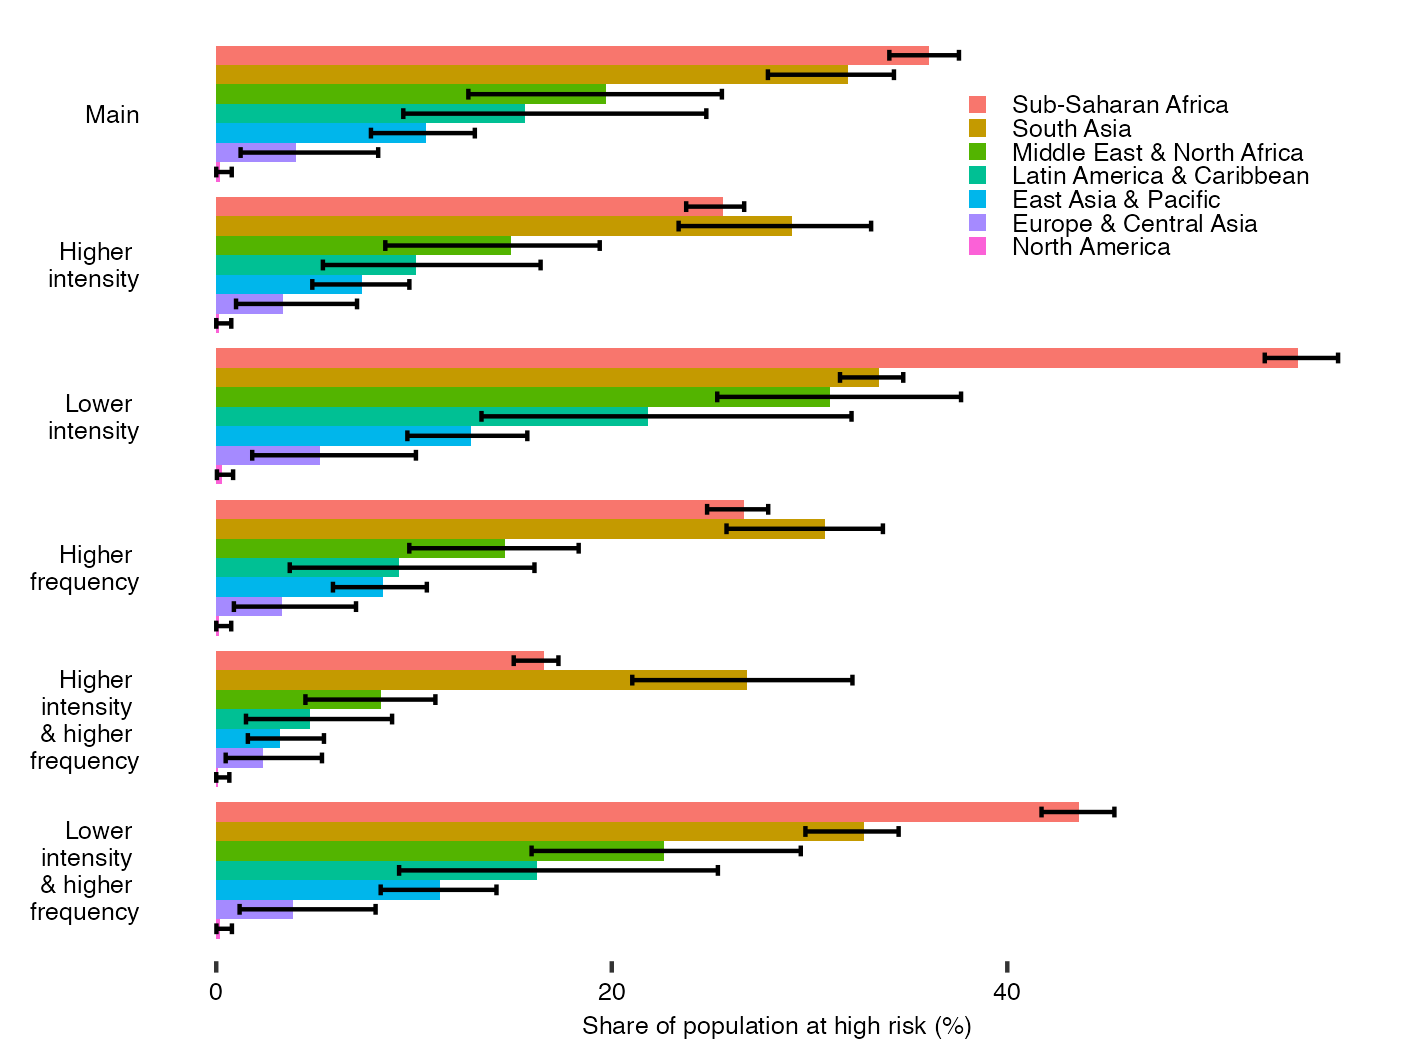** |

**a.** Global. **b.** By region. Intervals show the full extent of uncertainty (100% confidence interval) from assuming zero correlation between exposure and vulnerability within survey statistical regions.

**Figure S7: Population exposed and at high risk using alternate exposure thresholds (2021)**

| **a**  **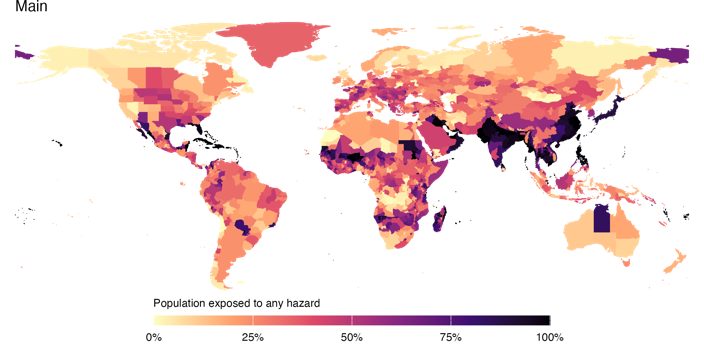** | **b**  **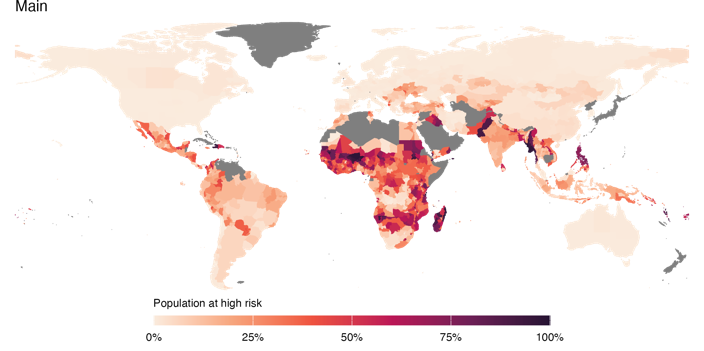** |
| --- | --- |
| **c**  **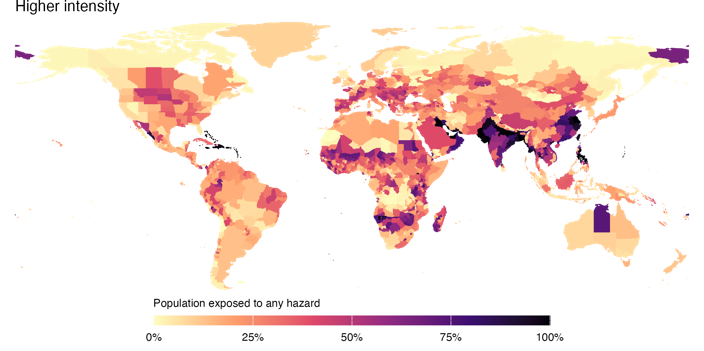** | **d**  **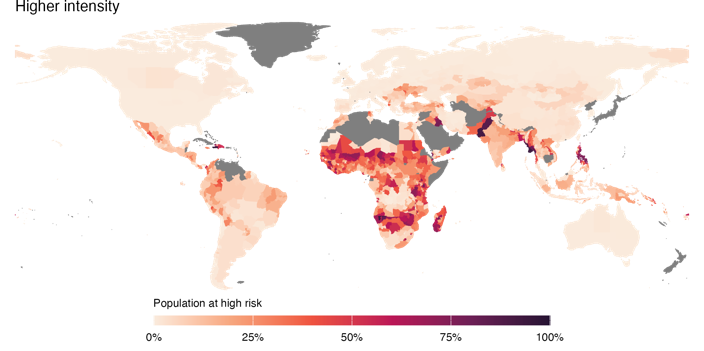** |
| **e**  **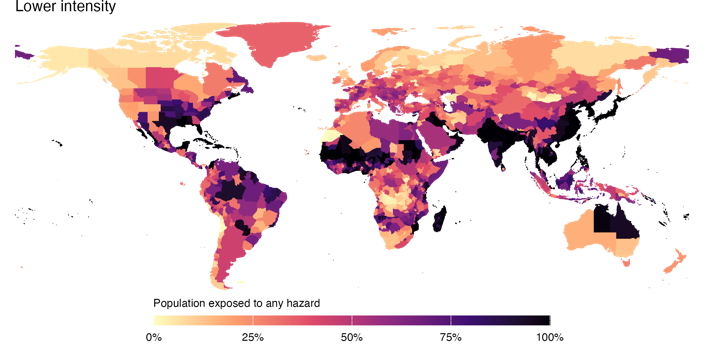** | **f**  **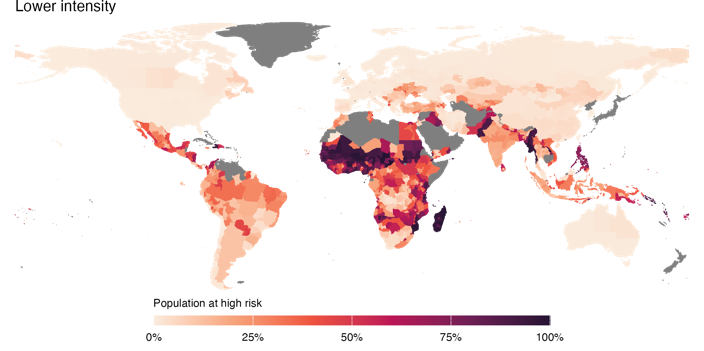** |
| **g**  **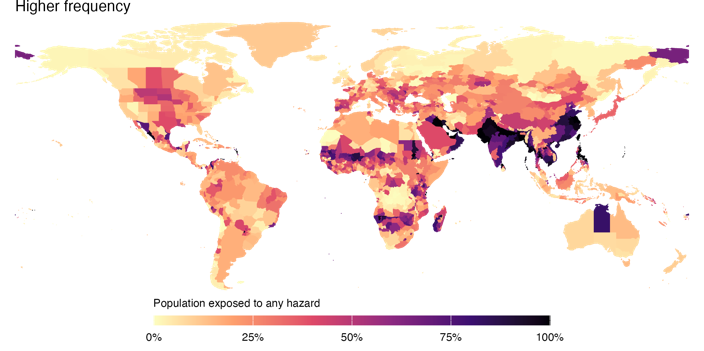** | **h**  **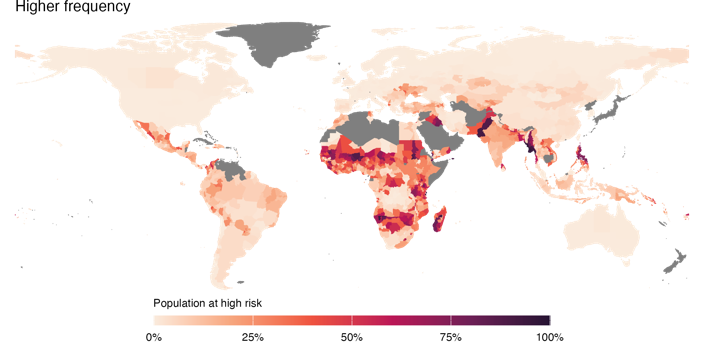** |
| **i**  **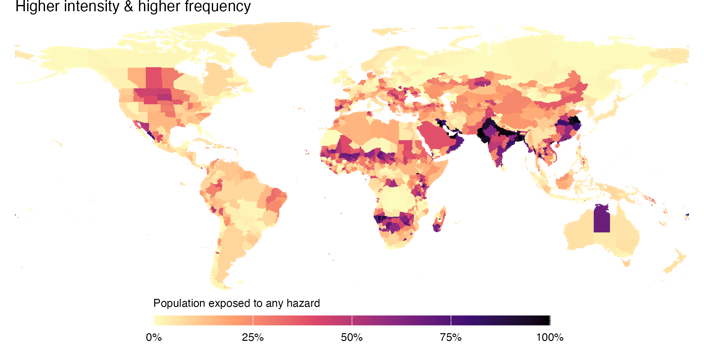** | **j**  **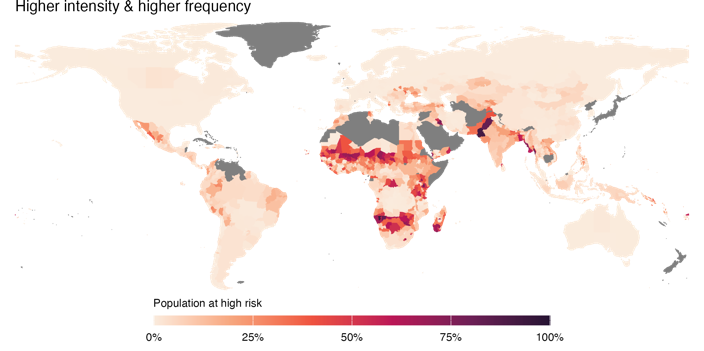** |
| **k**  **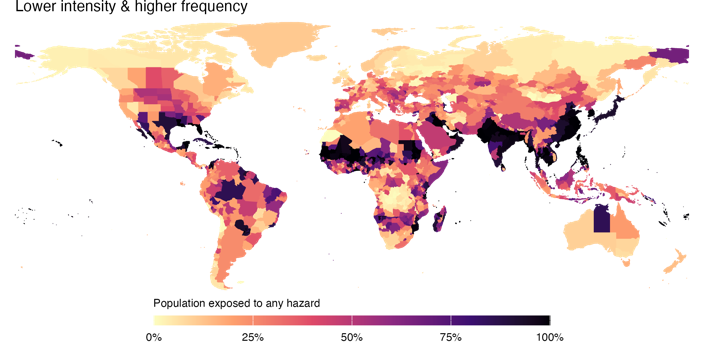** | **l**  **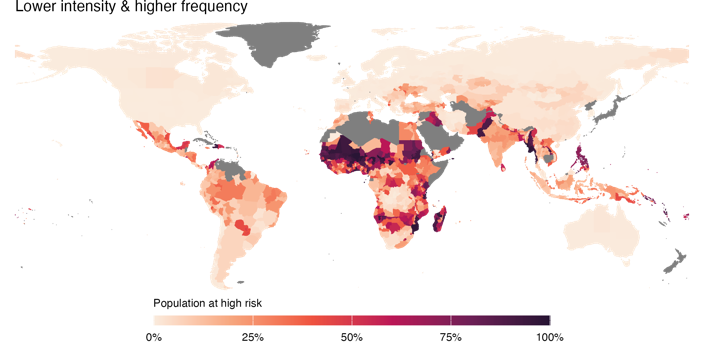** |

**Figure S8: Population at high risk using alternate thresholds – country level comparisons (2021)**

**
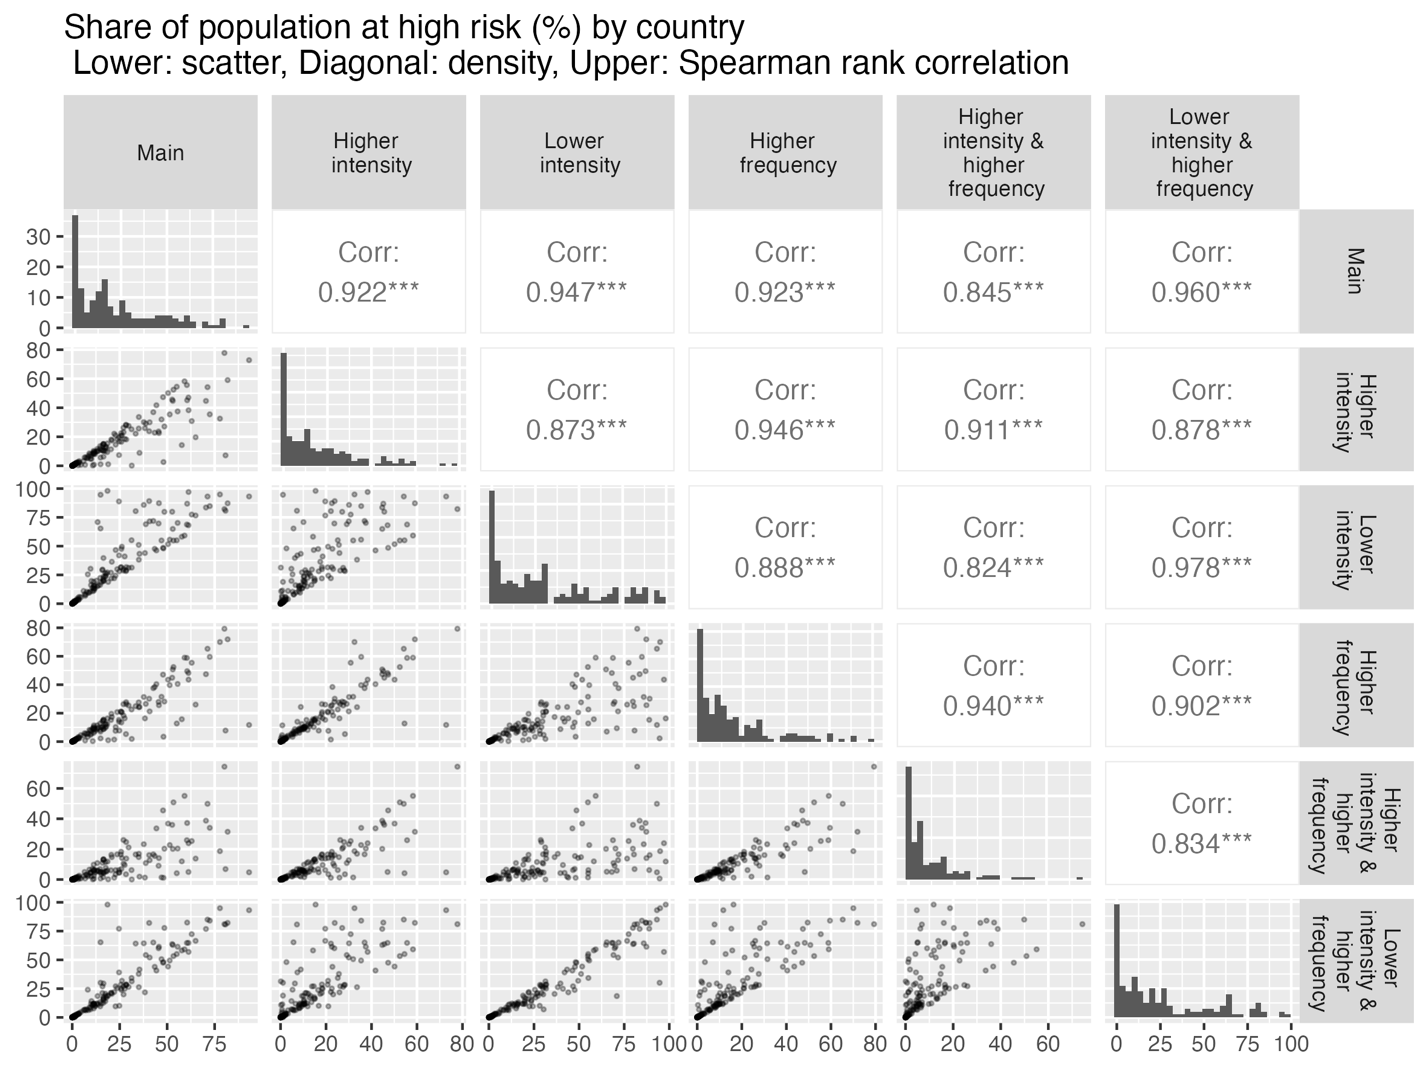
**

For completeness, we also estimate the share of population exposed to each type of hazard when using a larger range of intensity and frequency thresholds to define exposed locations. Results highlight the different relationships between event intensity, frequency and exposure for each type of hazard. Figure S9 shows exceedance probability curves at global level and Figure S10 maps the population exposed to hazard events exceeding various intensities and annual probabilities of occurrence.

**Figure S9: Global population exposed by hazard exceedance probability and intensity threshold (2021)**

| **a**  **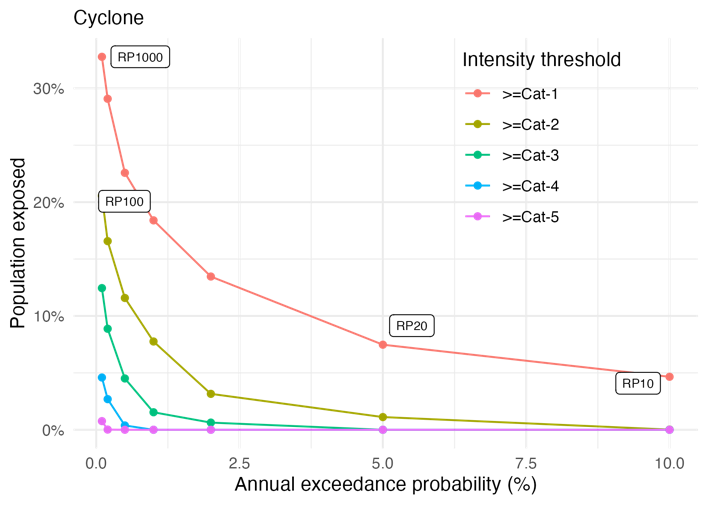** | **b**  **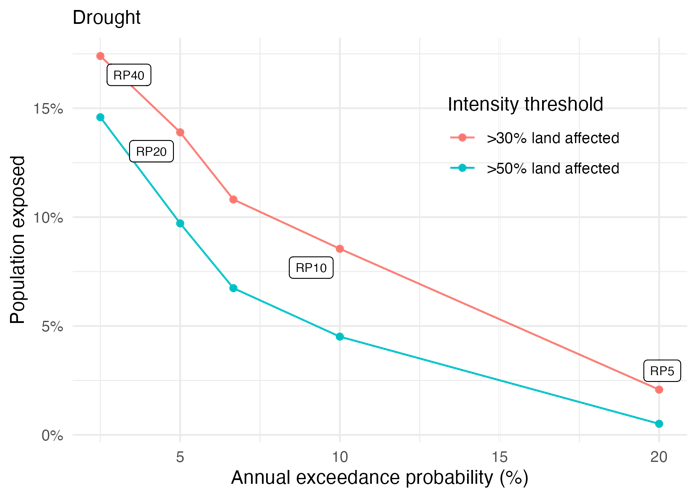** |
| --- | --- |
| **c**  **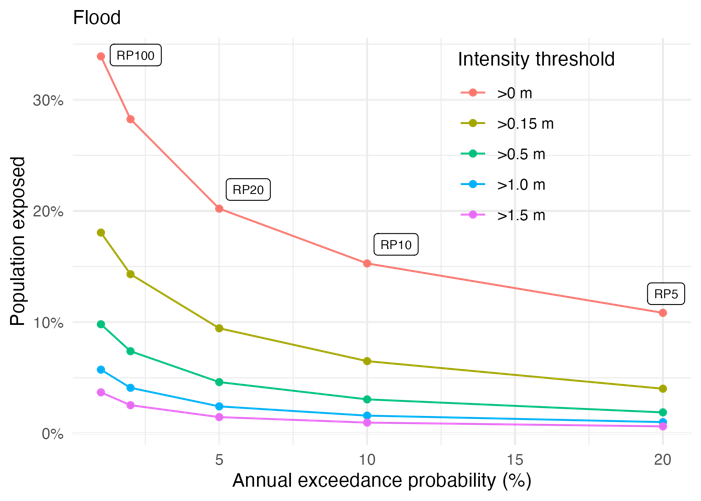** | **d**  **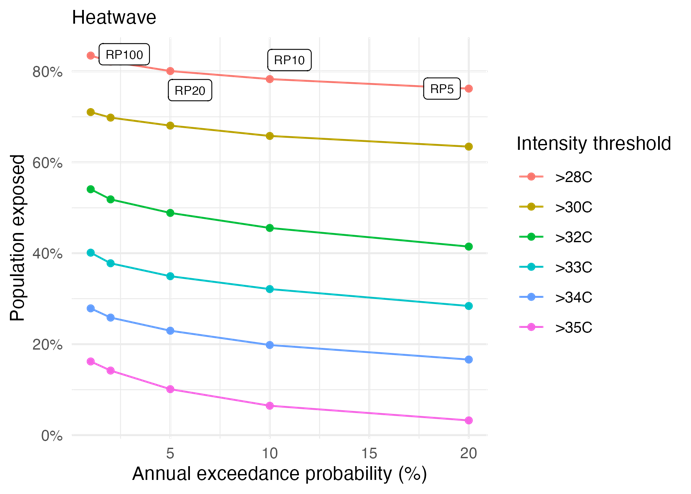** |

**Figure S10: Population exposed to tropical cyclones, by frequency and intensity thresholds**

| **a**  **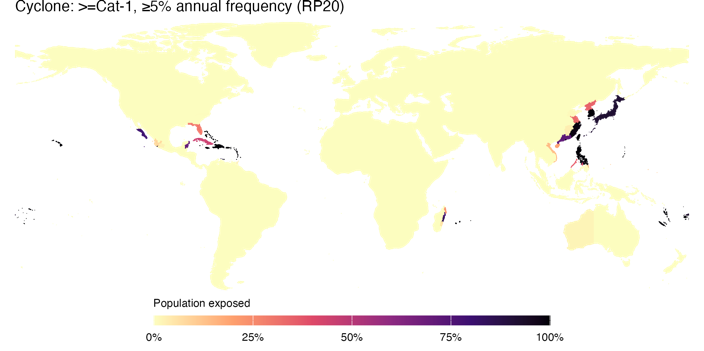** | **b**  **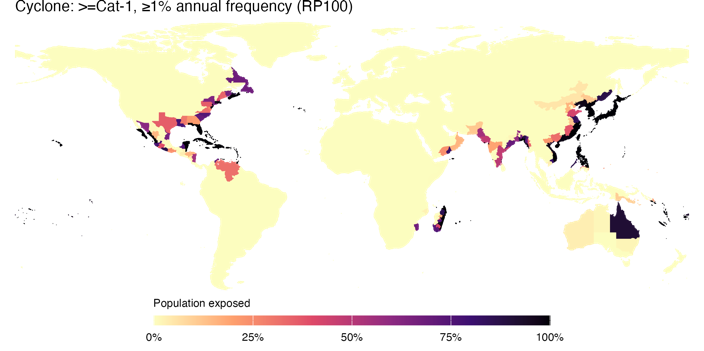** | **c**  **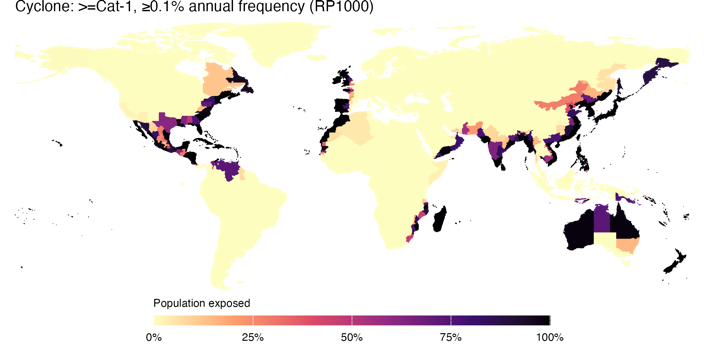** |
| --- | --- | --- |
| **d**  **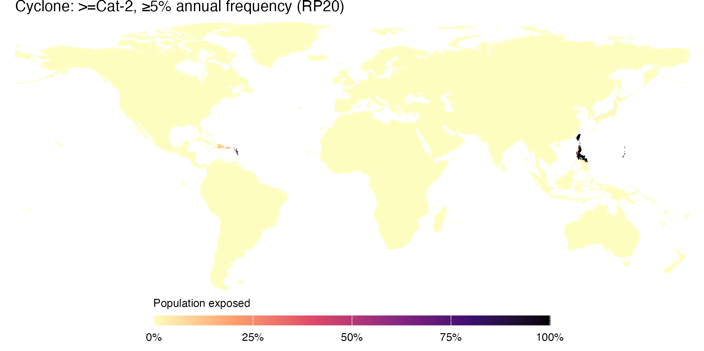** | **e**  **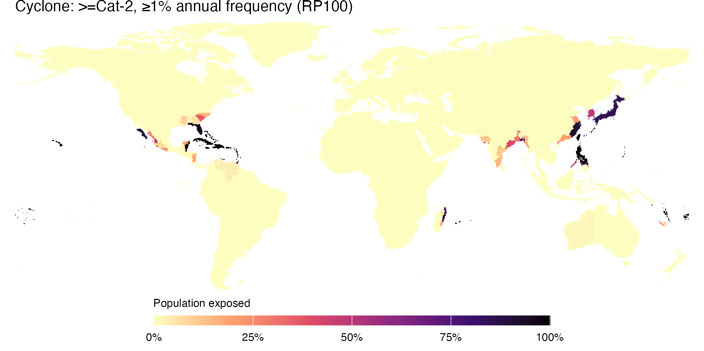** | **f**  **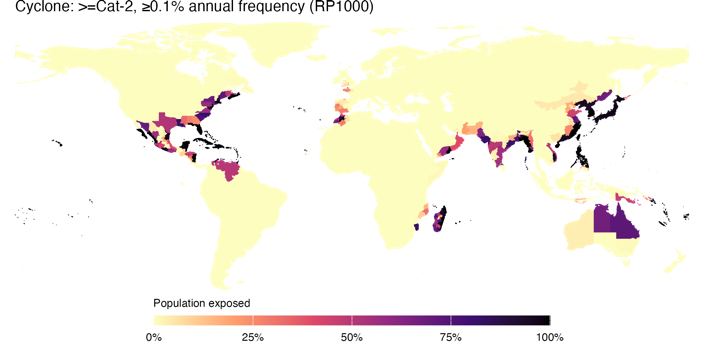** |
| **g**  **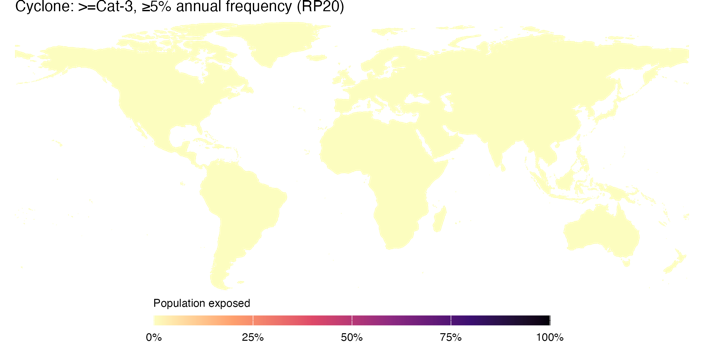** | **h**  **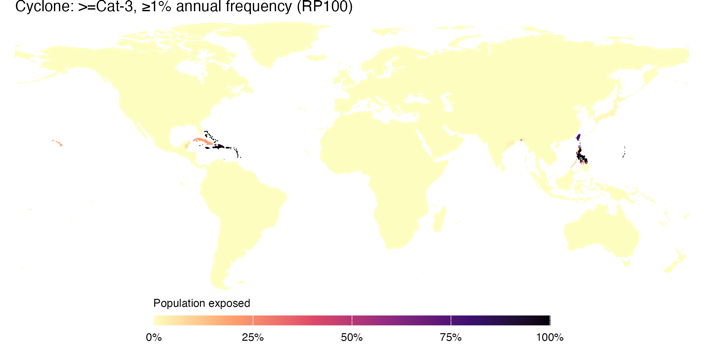** | **i**  **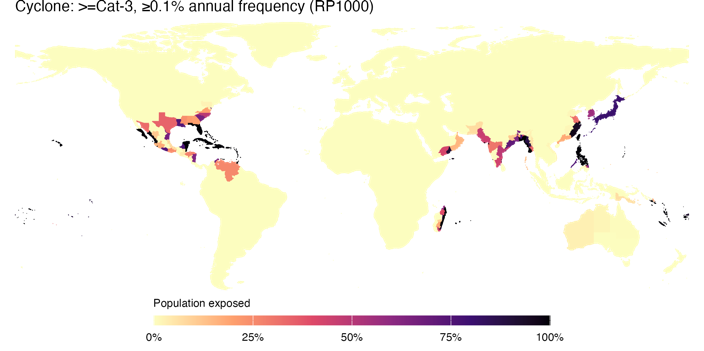** |

**Figure S11: Population exposed to agricultural droughts, by frequency and intensity thresholds**

| **a**  **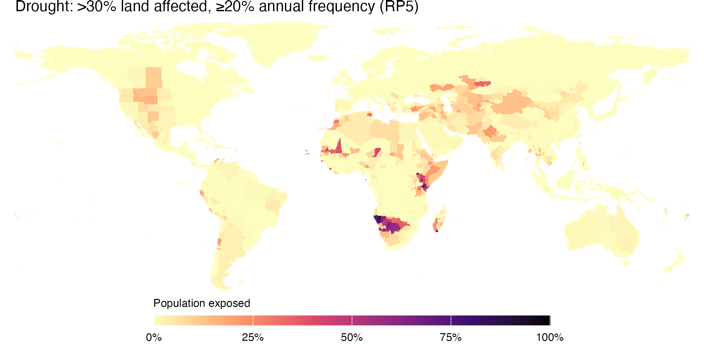** | **b**  **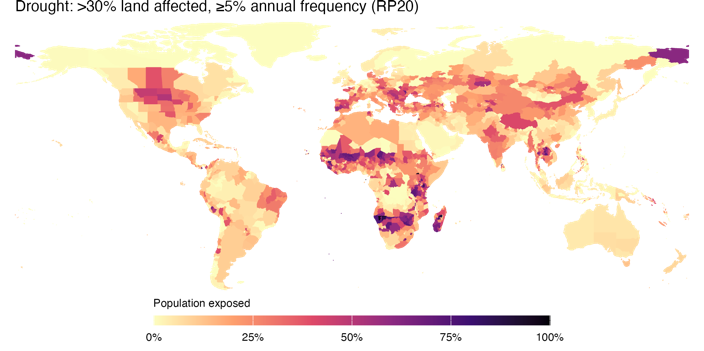** | **c**  **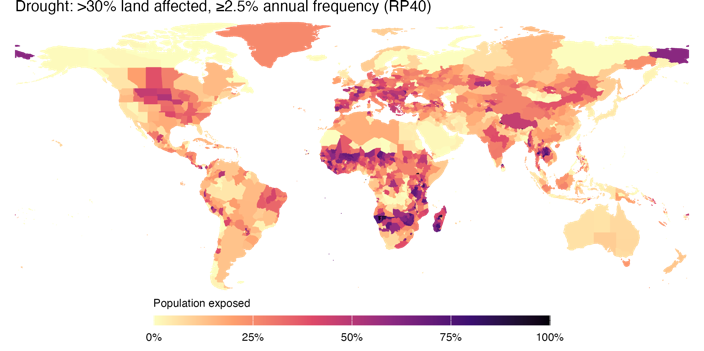** |
| --- | --- | --- |
| **d**  **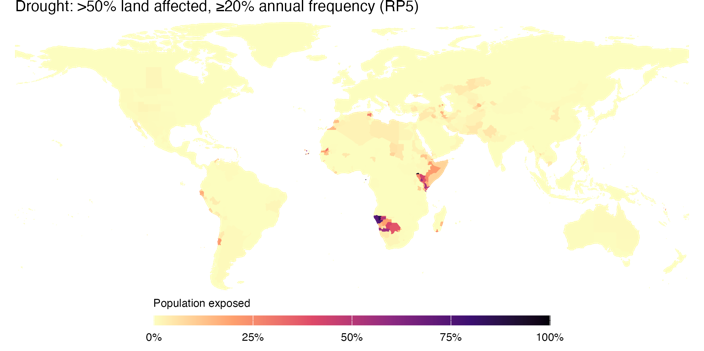** | **e**  **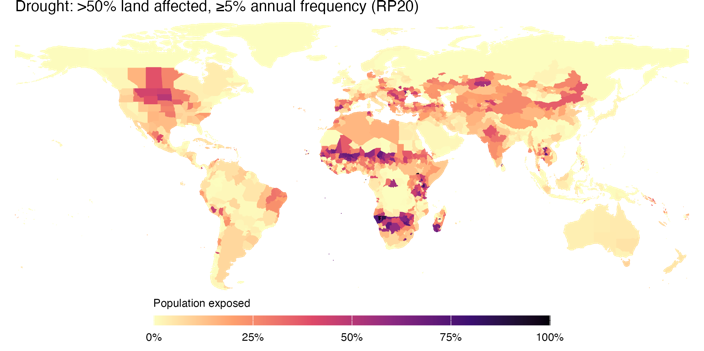** | **f**  **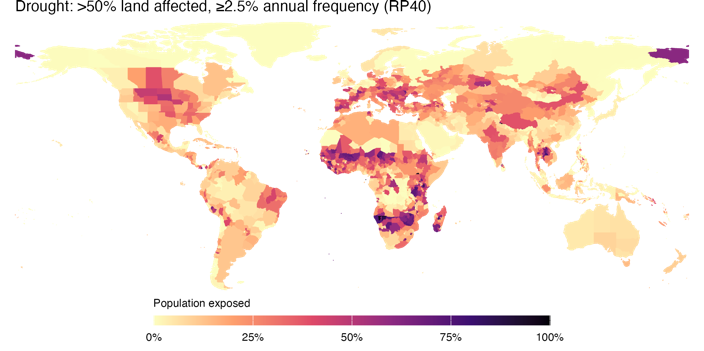** |

**Figure S12: Population exposed to floods, by frequency and intensity thresholds**

| **a**  **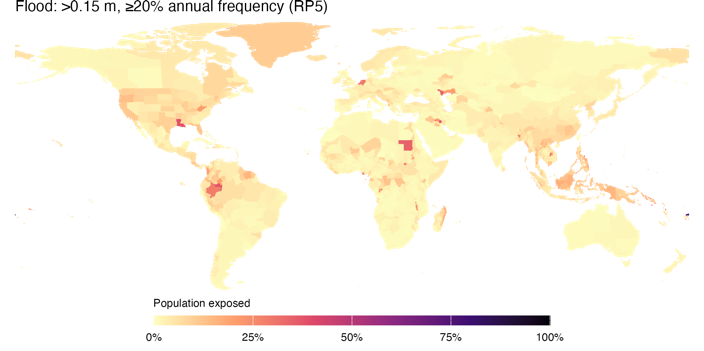** | **b**  **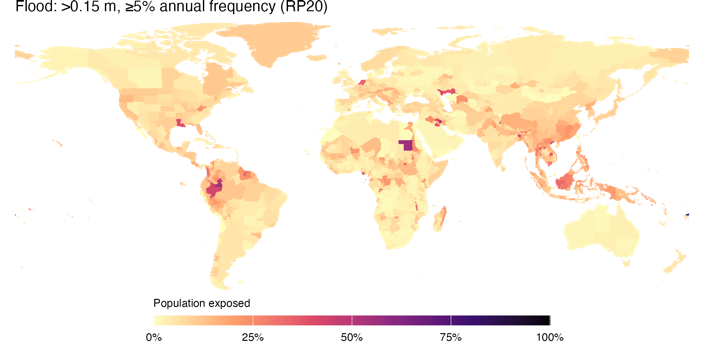** | **c**  **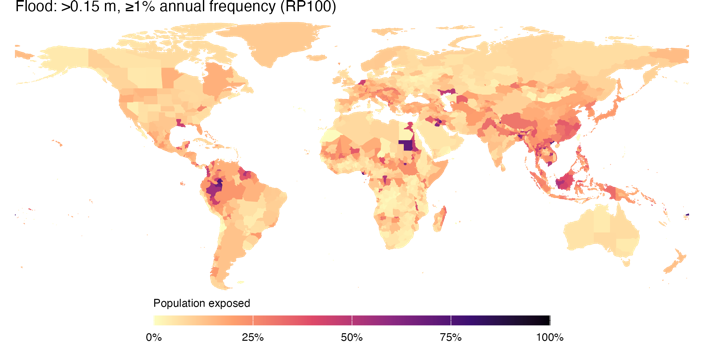** |
| --- | --- | --- |
| **d**  **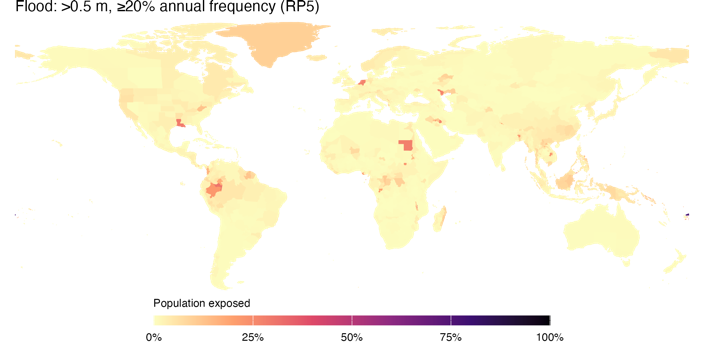** | **e**  **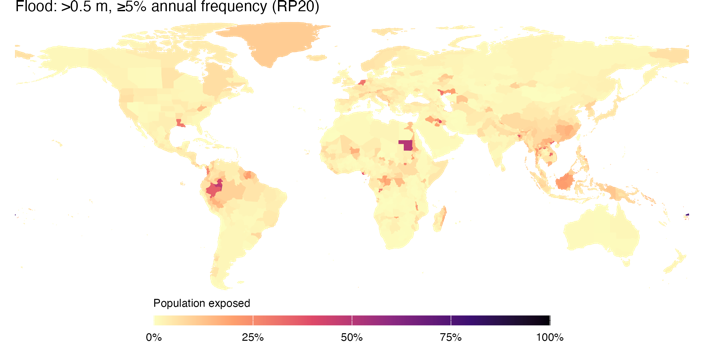** | **f**  **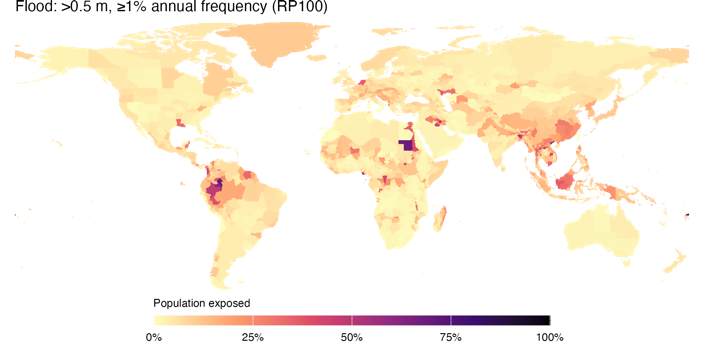** |
| **g**  **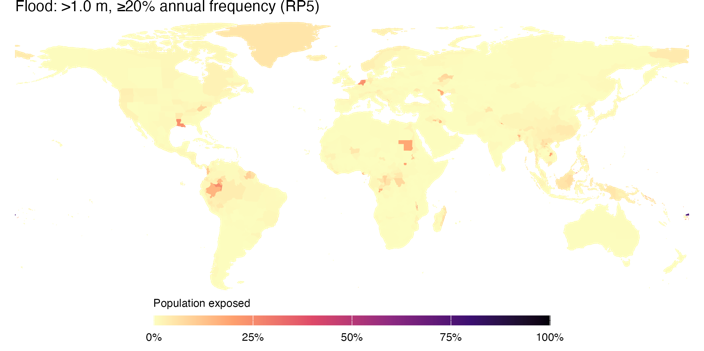** | **h**  **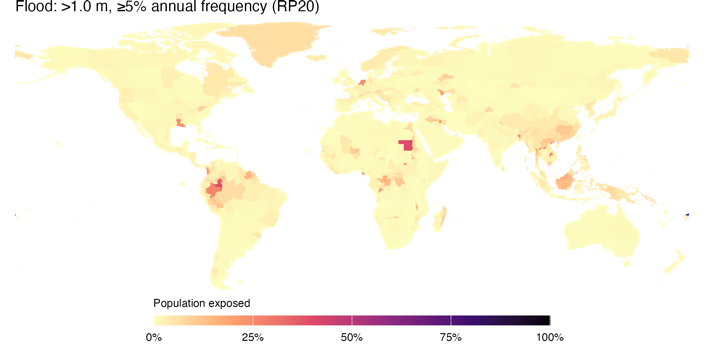** | **i**  **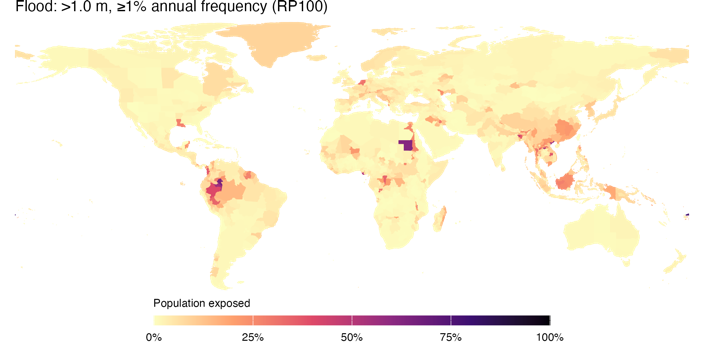** |

**Figure S13: Population exposed to heatwaves, by frequency and intensity thresholds**

| **a**  **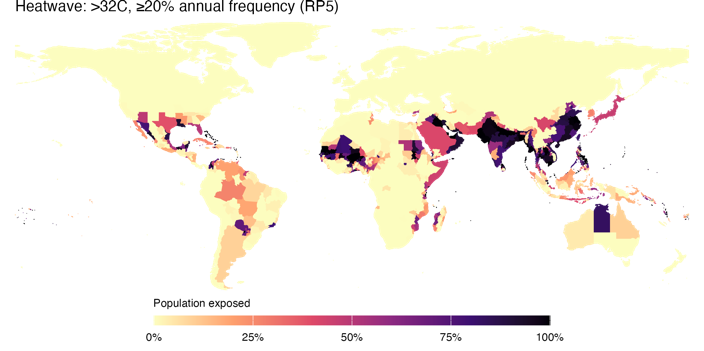** | **b**  **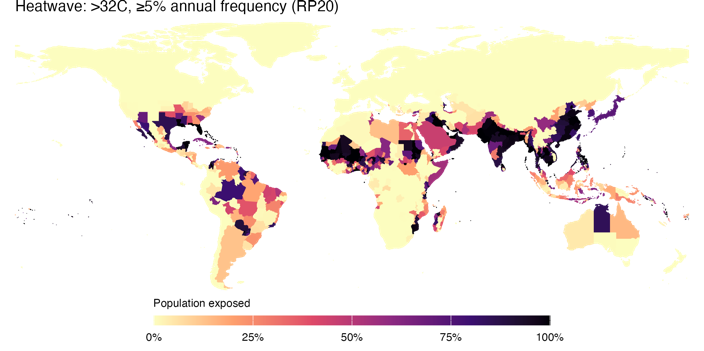** | **c**  **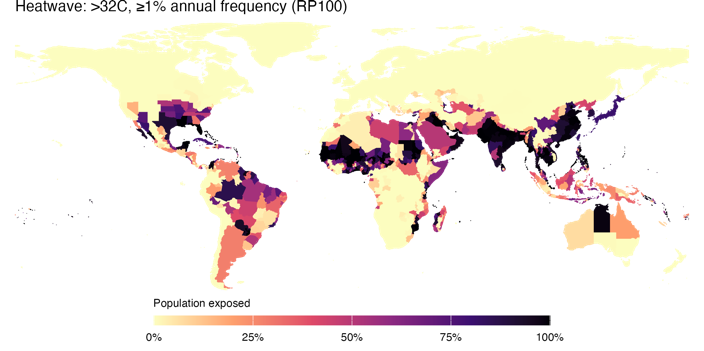** |
| --- | --- | --- |
| **d**  **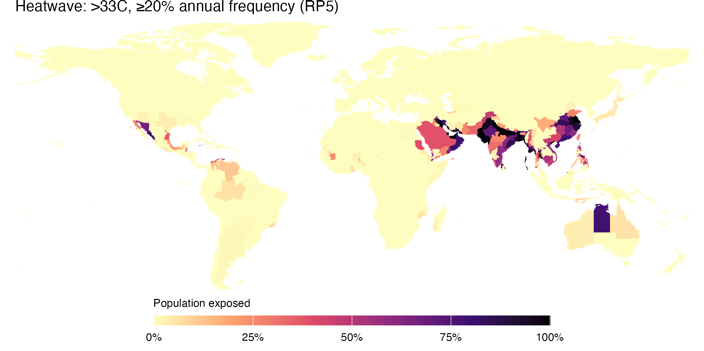** | **e**  **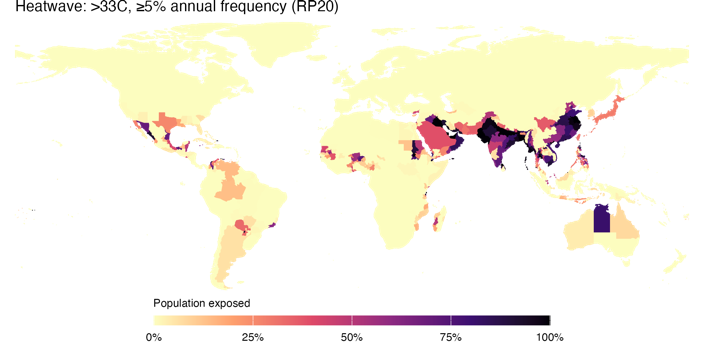** | **f**  **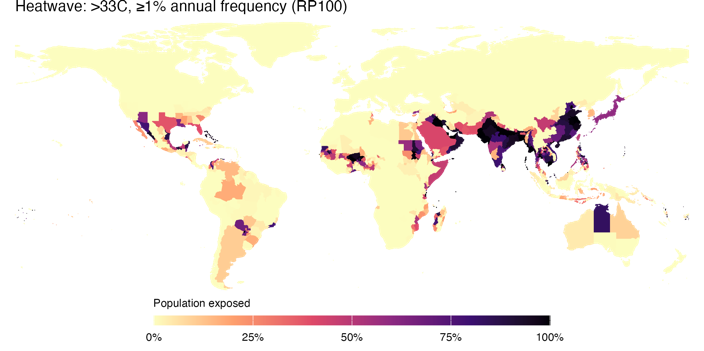** |
| **g**  **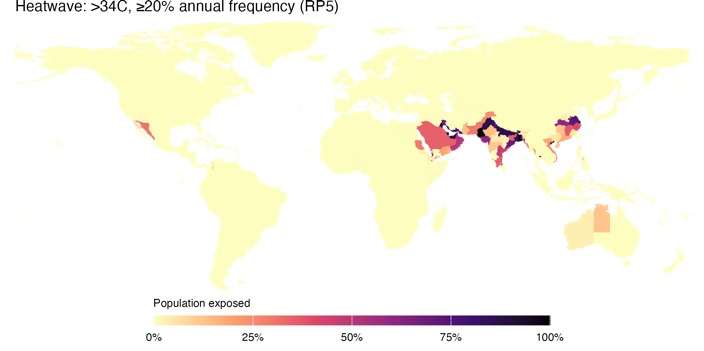** | **h**  **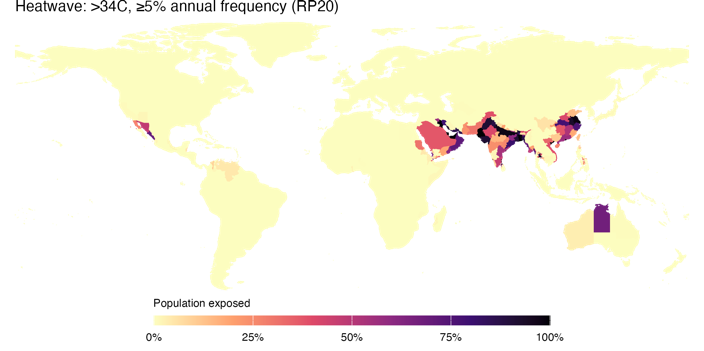** | **i**  **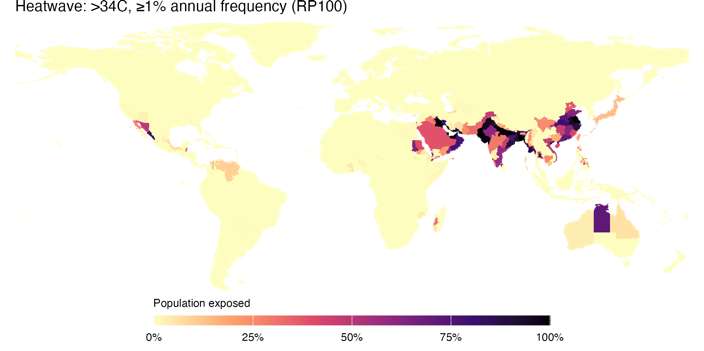** |

**Household surveys**

Table S3 lists household surveys from the World Bank’s Global Monitoring Database that were used for the analysis. The lineup year refers to the reference year of the indicator (2010 and 2021 respectively).

**Table S3: List of household survey data sources**

| **Lineup year** | **Country name** | **Survey year** | **Survey acronym** | **Survey title** | **Survey producer** | **Sample size** |
| --- | --- | --- | --- | --- | --- | --- |
| 2010 | Albania | 2012 | LSMS | Living Standards Measurement Survey 2012 | Institute of Statistics of Albania | 25,335 |
| 2010 | Angola | 2008 | IBEP-MICS | Inquérito Integrado sobre o Bem-Estar da População 2008-2009, IDR II e MICS III | Instituto Nacional de EstatÍstica | 45,398 |
| 2010 | Argentina | 2010 | EPHC-S2 | Encuesta Permanente de Hogares Continua - semestre II | Instituto Nacional de Estadãstica y Censos (INDEC) | 118,729 |
| 2010 | Armenia | 2010 | ILCS | Integrated Living Conditions Survey 2010 | National Statistical Service of the Republic of Armenia | 32,353 |
| 2010 | Australia | 2010 | SIH-HES-LIS | Survey of Income and Housing (SIH) and Household Expenditure Survey (HES) | Australian Bureau of Statistics (ABS) | 42,595 |
| 2010 | Austria | 2011 | EU-SILC | European Union Statistics on Income and Living Conditions 2011 | Statistics Austria | 13,933 |
| 2010 | Azerbaijan | 2005 | HBS | Household Budget Survey 2005 | State Statistical Committee of the Republic of Azerbaijan | 32,875 |
| 2010 | Bangladesh | 2010 | HIES | Household Income and Expenditure Survey 2010 | Bangladesh Bureau of Statistics | 55,580 |
| 2010 | Belarus | 2010 | HHS | Household Sample Survey 2010 | National Statistical Committee of the Republic of Belarus | 14,546 |
| 2010 | Belgium | 2011 | EU-SILC | European Union Statistics on Income and Living Conditions 2011 | Statistics Belgium - Statbel | 14,300 |
| 2010 | Benin | 2011 | EMICOV | Enquête Modulaire Intégrée sur les Conditions de Vie des Ménages 2011 | Institut National de la Statistique et de l'Analyse Économique (INSAE) | 17,974 |
| 2010 | Bhutan | 2012 | BLSS | Living Standards Survey 2012 | National Statistics Bureau (NSB) | 40,212 |
| 2010 | Bolivia | 2011 | EH | Encuesta de Hogares - MECOVI | Instituto Nacional de Estadãstica | 33,654 |
| 2010 | Bosnia and Herzegovina | 2011 | HBS | Household Budget Survey 2011 | Bosnia and Herzegovina Agency for Statistics | 22,853 |
| 2010 | Botswana | 2009 | CWIS | Core Welfare Indicators Survey 2009-2010 | Central Statistics Office (CSO) | 27,211 |
| 2010 | Brazil | 2011 | PNAD | Pesquisa Nacional por Amostra de Domicilios 2011 | Instituto Brasileiro de Geografia e EstatÍstica | 345,653 |
| 2010 | Bulgaria | 2011 | EU-SILC | European Union Statistics on Income and Living Conditions 2011 | National Statistical Institute (NSI) | 17,180 |
| 2010 | Burkina Faso | 2009 | ECVM | Enquête Intégrale sur les Conditions de Vie des Ménages Burkinabè en 2009 | Institut National de la Statistique et de la Démographie | 57,155 |
| 2010 | Burundi | 2013 | ECVMB | The correct spelling is "Enquête sur les conditions de vie des ménages 2013 | Institut de Statistiques et d’Études Économiques du Burundi (ISTEEBU) | 32,647 |
| 2010 | Cabo Verde | 2007 | QUIBB | Questionário Unificado de Indicadores Básicos de Bem-Estar 2007 | Instituto Nacional de EstatÍstica (INE) | 33,756 |
| 2010 | Cameroon | 2007 | ECAM-III | Troisième Enquête Camerounaise Auprès des Ménages 2007 | Institut National de la Statistique (INS) | 51,190 |
| 2010 | Canada | 2010 | SLID-LIS | Survey of Labour and Income Dynamics (SLID) | Statistics Canada | 60,362 |
| 2010 | Central African Republic | 2008 | ECASEB | Enquête Centrafricaine pour le Suivi-Evaluation du Bien-être 2008 | Institut Centrafricain des Statistiques et des Etudes Economiques et Sociales, Ministère du plan, de l'Économie et de la Coopération internationale | 31,966 |
| 2010 | Chad | 2011 | ECOSIT-III | Enquête sur la Consommation des Ménages et le Secteur Informel au Tchad 2011 | Institut National de la Statistique, des Etudes Economiques et Démographiques (INSEED) | 49,985 |
| 2010 | Chile | 2011 | CASEN | Encuesta de Caracterización Socioeconómica Nacional | Ministerio de Desarrollo Social - Gobierno de Chile | 197,408 |
| 2010 | China | 2013 | CHIP | China Household Income Project | National Bureau of Statistics of China, National Bureau of Statistics | 61,162 |
| 2010 | Colombia | 2010 | GEIH | Gran Encuesta Integrada de Hogares 2010 | Departamento Administrativo Nacional de Estadistica (DANE) | 814,189 |
| 2010 | Comoros | 2013 | EESIC | Enquête sur l’Emploi, le Secteur Informel et la Consommation des Ménages aux Comores 2014 | Direction de la Statistique | 10,671 |
| 2010 | Congo, Dem. Rep. | 2012 | E123 | Enquête sur l’Emploi, le Secteur Informel et sur la Consommation des Ménages 2012, Enquête 1-2-3 | Institut National de la Statistique (INS) | 110,529 |
| 2010 | Congo, Rep. | 2011 | ECOM | Enquête Congolaise Auprès des Ménages pour le Suivi et l'Evaluation de la Pauvreté 2011 | Centre National de la Statistique et des Études Économiques (CNSEE) | 44,736 |
| 2010 | Costa Rica | 2010 | ENAHO | Encuesta Nacional de Hogares 2010, Julio | Instituto Nacional de Estadãstica y Censos (INEC) | 41,098 |
| 2010 | Croatia | 2011 | EU-SILC | European Union Statistics on Income and Living Conditions 2011 | Croatian Bureau of Statistics - CBS | 16,896 |
| 2010 | Cyprus | 2011 | EU-SILC | European Union Statistics on Income and Living Conditions 2011 | The Statistical Service of Cyprus | 11,443 |
| 2010 | Czech Republic | 2011 | EU-SILC | European Union Statistics on Income and Living Conditions 2011 | Czech Statistical Office | 20,629 |
| 2010 | Côte d'Ivoire | 2008 | ENV | Enquête sur le Niveau de Vie des Ménages 2008 | Institut National de la Statistique | 59,083 |
| 2010 | Denmark | 2011 | EU-SILC | European Union Statistics on Income and Living Conditions 2011 | Statistics Denmark | 13,151 |
| 2010 | Djibouti | 2012 | EDAM | Enquête Djiboutienne Auprès des Ménages | Direction de la Statistique et des Etudes Démographiques (DISED) | 31,683 |
| 2010 | Dominican Republic | 2010 | ENFT | Encuesta Nacional de Fuerza de Trabajo | Banco Central de la República Dominicana | 29,901 |
| 2010 | Ecuador | 2010 | ENEMDU | Encuesta de Empleo, Desempleo y Subempleo | Instituto Nacional de Estadãstica y Censo (INEC) | 82,356 |
| 2010 | Egypt, Arab Rep. | 2010 | HIECS | Household Income, Expenditure, and Consumption Survey 2010 | Central Agency for Public Mobilization and Statistics | 34,069 |
| 2010 | El Salvador | 2010 | EHPM | Encuesta de Hogares de Propósitos Múltiples | Dirección General de Estadãstica y Censos (DIGESTYC) | 85,087 |
| 2010 | Estonia | 2011 | EU-SILC | European Union Statistics on Income and Living Conditions 2011 | Statistics Estonia | 13,426 |
| 2010 | Eswatini | 2009 | HIES | Household Income and Expenditure Survey 2009-2010 | Central Statistical Office | 14,145 |
| 2010 | Ethiopia | 2010 | HICES | Household Income, Consumption and Expenditure Survey 2010-2011 | Central Statistical Agency (CSA) - Ministry of Finance and Economic Development | 118,991 |
| 2010 | Fiji | 2008 | HIES | Household Income and Expenditure Survey 2008-2009 | Fiji Islands Bureau of Statistics (FIBoS) - Government of Fiji | 16,814 |
| 2010 | Finland | 2011 | EU-SILC | European Union Statistics on Income and Living Conditions 2011 | Statistics Finland | 23,018 |
| 2010 | France | 2011 | EU-SILC | European Union Statistics on Income and Living Conditions 2011 | INSEE - National Institute for Statistics and Economic Studies | 27,071 |
| 2010 | Gabon | 2005 | EGEP | Enquête Gabonaise pour l'Evaluation et le Suivi de la Pauvreté 2005 | Direction Générale de la Statistique et des Etudes Economiques (DGSEE) | 37,601 |
| 2010 | Gambia, The | 2010 | IHS | Integrated Household Survey 2010 | The Gambia Bureau of Statistics | 37,224 |
| 2010 | Georgia | 2010 | HIS | Household Integrated Survey 2010 | National Statistics Office of Georgia | 79,471 |
| 2010 | Germany | 2010 | GSOEP-LIS | German Social Economic Panel Study (GSOEP) | German Institute for Economic Research / Deutsches Institut für Wirtschaftsforschung (DIW) | 44,134 |
| 2010 | Ghana | 2012 | GLSS-VI | Ghana Living Standards Survey 6 | Ghana Statistical Service | 72,372 |
| 2010 | Greece | 2011 | EU-SILC | European Union Statistics on Income and Living Conditions 2011 | Hellenic Statistical Authority (ELSTAT) | 15,067 |
| 2010 | Grenada | 2018 | SLCHB | Survey of Living Conditions and Household Budgets 2018 | Central Statistics Office of Grenada | 2,256 |
| 2010 | Guatemala | 2014 | ENCOVI | Encuesta Nacional de Condiciones de Vida | Instituto Nacional de Estadãstica de Guatemala | 54,688 |
| 2010 | Guinea | 2012 | ELEP | Enquête Légère pour l'Evaluation de la Pauvreté 2012 | Institut National de la Statistique | 49,572 |
| 2010 | Guinea-Bissau | 2010 | ILAP-II | Inquerito Ligeiro para a Avaliação da Pobreza 2010 | Instituto Nacional de EstatÍstica e Censos (INEC) | 26,134 |
| 2010 | Haiti | 2012 | ECVMAS | Enquête sur les Conditions de Vie des Ménages après Séisme 2012 | Haitian Institute of Statistics and Information (IHSI) | 23,398 |
| 2010 | Honduras | 2010 | EPHPM | Encuesta Permanente de Hogares de Propósitos Múltiples | Instituto Nacional de Estadãstica de Honduras | 31,724 |
| 2010 | Hungary | 2011 | EU-SILC | European Union Statistics on Income and Living Conditions 2011 | Hungarian Central Statistical Office | 29,474 |
| 2010 | Iceland | 2011 | EU-SILC | European Union Statistics on Income and Living Conditions 2011 | Statistics Iceland | 8,851 |
| 2010 | India | 2011 | NSS-SCH1 | National Sample Survey 2011-2012 (68th round) | National Sample Survey Organisation (NSSO) | 464,960 |
| 2010 | Indonesia | 2010 | SUSENAS | National Socio-Economic Survey 2010 | Central Bureau of Statistics (BPS) of Indonesia | 262,901 |
| 2010 | Iran, Islamic Rep. | 2009 | HEIS | Households Income and Expenditure Survey 2009-2010 | Statistical Center of Iran | 150,462 |
| 2010 | Iraq | 2012 | IHSES | Household Socio-Economic Survey 2012 | Organization for Statistics and Information Technology (COSIT), Kurdistan Regional Statistics Office (KRSO) | 174,863 |
| 2010 | Ireland | 2011 | EU-SILC | European Union Statistics on Income and Living Conditions 2011 | Central Statistics Office Ireland | 11,005 |
| 2010 | Israel | 2010 | HES-LIS | Household Expenditure Survey | National Insurance Institute of Israel | 20,137 |
| 2010 | Italy | 2011 | EU-SILC | European Union Statistics on Income and Living Conditions 2011 | Italian National Institute of Statistics | 47,841 |
| 2010 | Japan | 2010 | JHPS-LIS | Japan Household Panel Survey Data (JHPS) | Keio University Joint Research Center for Panel Studies | 20,101 |
| 2010 | Jordan | 2010 | HEIS | Household Expenditure and Income Survey 2010 | Department of Statistics (DoS) | 61,051 |
| 2010 | Kazakhstan | 2010 | HBS | Household Budget Survey 2010 | The Agency of Statistics of the Republic of Kazakhstan | 167,313 |
| 2010 | Kenya | 2015 | IHBS | Integrated Household Budget Survey 2015-2016 | Kenya National Bureau of Statistics | 92,846 |
| 2010 | Kiribati | 2006 | HIES | Household Income and Expenditure Survey 2006 | National Statistical Office | 6,725 |
| 2010 | Korea, Rep. | 2010 | HIES-FHES-LIS | Household Income and Expenditure Survey (HIES) and Farm Household Income and Expenditure Survey (FHES) | Statistics Korea | 37,823 |
| 2010 | Kosovo | 2010 | HBS | Household Budget Survey 2010 | Kosovo Agency of Statistics | 13,721 |
| 2010 | Kyrgyz Republic | 2010 | KIHS | Kyrgyz Integrated Household Survey 2010 | National Statistical Committee of the Kyrgyz Republic | 73,865 |
| 2010 | Lao PDR | 2012 | LECS | Expenditure and Consumption Survey 2012-2013 | Lao Statistics Bureau | 43,641 |
| 2010 | Latvia | 2011 | EU-SILC | European Union Statistics on Income and Living Conditions 2011 | Central Statistical Bureau of Latvia | 15,891 |
| 2010 | Lebanon | 2011 | HBS | Household Budget Survey 2011-2012 | Central Administration for Statistics | 11,535 |
| 2010 | Lesotho | 2017 | CMSHBS | Continuous Multipurpose Household Survey/ Household Budget Survey 2017 - 2018 | Bureau of Statistics (BoS) - Ministry of Finsnce and development Planning | 17,288 |
| 2010 | Liberia | 2007 | CWIQ | Core Welfare Indicators Questionnaire 2007 | Liberia Institute of Statistics and Geo_Information Services | 20,034 |
| 2010 | Lithuania | 2011 | EU-SILC | European Union Statistics on Income and Living Conditions 2011 | Statistics Lithuania | 12,492 |
| 2010 | Luxembourg | 2011 | EU-SILC | European Union Statistics on Income and Living Conditions 2011 | Luxembourg Institute of Socio-Economic Research (LISER) | 14,891 |
| 2010 | Madagascar | 2010 | EPM | Enquête Périodique auprès des Ménages 2010 | Institut National de la Statistique de Madagascar | 59,374 |
| 2010 | Malawi | 2010 | IHS-III | Third Integrated Household Survey 2010-2011 | National Statistical Office (NSO) | 54,664 |
| 2010 | Malaysia | 2012 | HIS | Household Income/Basic Amenities Survey | Department of Statistics | 185,911 |
| 2010 | Maldives | 2009 | HIES | Household Income and Expenditure Survey 2009-2010 | Department of National Planning | 11,565 |
| 2010 | Mali | 2009 | ELIM | Enquête Légère Intégrée auprès des Ménages 2009 | Direction Nationale de la Statistique et Information | 86,936 |
| 2010 | Malta | 2011 | EU-SILC | European Union Statistics on Income and Living Conditions 2011 | National Statistics Office - Malta | 11,207 |
| 2010 | Marshall Islands | 2019 | HIES | Household Income and Expenditure Survey 2019/2020 | National Statistical Office | 4,769 |
| 2010 | Mauritania | 2008 | EPCV | Enquête Permanente sur les Conditions de Vie des Ménages 2008 | Office National de la Statistique | 74,801 |
| 2010 | Mauritius | 2012 | HBS | Household Budget Survey 2012 | Central Statistics Office | 23,741 |
| 2010 | Mexico | 2010 | ENIGH | Encuesta Nacional de Ingresos y Gastos de los Hogares 2010 (Tradicional) | Instituto Nacional de Estadãstica, Geografía e Informática (INEGI) | 105,146 |
| 2010 | Micronesia, Fed. Sts. | 2013 | HIES | Household Income and Expenditure Survey 2013 | Divison of Statistics - Office of Statistics, Budget and Economic Management, Overseas Development Assistance and Compact Management (SBOC) | 9,934 |
| 2010 | Moldova | 2010 | HBS | Household Budget Survey 2010 | National Bureau of Statistics of the Republic of Moldova | 14,379 |
| 2010 | Mongolia | 2010 | HSES | Household Socio Economic Survey 2010 | National Statistical Office | 43,355 |
| 2010 | Montenegro | 2013 | SILC-C | Survey on Income and Living Conditions 2013 | Statistical Office of Montenegro | 11,725 |
| 2010 | Morocco | 2013 | ENCDM | Enquête Nationale sur la Consommation et les Dépenses des Ménages 2013-2014 | Direction de la statistique | 75,691 |
| 2010 | Mozambique | 2008 | IOF | Inquérito sobre Orçamento Familiar 2008-2009 | Direcção de Censos e Inquéritos | 51,177 |
| 2010 | Myanmar | 2015 | MPLCS | Myanmar Poverty and Living Conditions Survey 2015 | National Statistics Office, Myanmar | 16,651 |
| 2010 | Namibia | 2009 | NHIES | National Household Income and Expenditure Survey - NHIES | Central Bureau of Statistics National Planning Commission | 44,614 |
| 2010 | Nauru | 2012 | HIES | Household Income and Expenditure Survey 2012/2013 | Bureau of Statistics, Department of Finance | 3,150 |
| 2010 | Nepal | 2010 | LSS-III | Living Standards Survey 2010-2011, Third Round | Central Bureau of Statistics | 28,474 |
| 2010 | Netherlands | 2011 | EU-SILC | European Union Statistics on Income and Living Conditions 2011 | Statistics Netherlands | 25,461 |
| 2010 | Nicaragua | 2009 | EMNV | Encuesta Nacional de Hogares sobre Medición de Nivel de Vida | Instituto Nacional de Estadãsticas, Geografía e Informática (INIDE) | 30,189 |
| 2010 | Niger | 2011 | ECVMA | National Survey on Household Living Conditions and Agriculture 2011 | Survey and Census Division, National Institute of Statistics | 24,791 |
| 2010 | Nigeria | 2010 | GHSP-W1 | General Household Survey, Panel 2010-2011, Wave 1 | National Bureau of Statistics (NBS) | 55,782 |
| 2010 | North Macedonia | 2011 | SILC-C | Survey of Income and Living Conditions 2011 | State Statistical Office of the Republic of Macedonia | 15,328 |
| 2010 | Norway | 2011 | EU-SILC | European Union Statistics on Income and Living Conditions 2011 | Statistics Norway | 11,730 |
| 2010 | Pakistan | 2010 | HIES | Household Integrated Economic Survey (HIES) 2010-2011 | Federal Bureau of Statistics | 108,931 |
| 2010 | Panama | 2010 | EH | Encuesta de Mercado Laboral 2010 | Instituto Nacional de Estadãstica y Censos | 48,759 |
| 2010 | Papua New Guinea | 2009 | HIES | Household Income and Expenditure Survey 2009-2010 | National Statistical Office | 20,369 |
| 2010 | Paraguay | 2010 | EPH | Encuesta Permanente de Hogares | Dirección General de Estadãstica, Encuestas y Censos | 20,316 |
| 2010 | Peru | 2010 | ENAHO | Encuesta Nacional de Hogares sobre Condiciones de Vida y Pobreza 2010 | Instituto Nacional de Estadãstica e Informática (INEI) | 87,428 |
| 2010 | Philippines | 2009 | FIES | Family Income and Expenditure Survey 2009 | Philippine Statistics Authority | 186,826 |
| 2010 | Poland | 2011 | EU-SILC | European Union Statistics on Income and Living Conditions 2011 | Central Statistical Office of Poland | 36,720 |
| 2010 | Portugal | 2011 | EU-SILC | European Union Statistics on Income and Living Conditions 2011 | Statistics Portugal | 14,662 |
| 2010 | Romania | 2011 | EU-SILC | European Union Statistics on Income and Living Conditions 2011 | National Institute of Statistics - NIS | 17,864 |
| 2010 | Russian Federation | 2010 | HBS | Household Budget Survey 2010 | Federal State Statistics Service of the Russian Federation | 540,091 |
| 2010 | Rwanda | 2010 | EICV-III | Integrated Household Living Conditions Survey 2010-2011 | National Institute of Statistics of Rwanda (NISR) | 67,415 |
| 2010 | Samoa | 2008 | HIES | Household Income and Expenditure Survey 2008 | Bureau of Statistics - Government of Samoa | 14,651 |
| 2010 | Senegal | 2011 | ESPS-II | Enquête de Suivi de la Pauvreté au Sénégal 2011 | Agence Nationale de la Statistique et de la Démographie | 55,017 |
| 2010 | Serbia | 2010 | HBS | Household Budget Survey 2010 | Statistical Office of the Republic of Serbia | 13,547 |
| 2010 | Seychelles | 2013 | HBS | Household Budget Survey 2013 | National Bureau of Statistics | 6,514 |
| 2010 | Sierra Leone | 2011 | SLIHS | Integrated Household Survey 2011 | Statistics Sierra Leone (SSL) | 37,921 |
| 2010 | Slovak Republic | 2011 | EU-SILC | European Union Statistics on Income and Living Conditions 2011 | Statistical Office of the Slovak Republic | 15,335 |
| 2010 | Slovenia | 2011 | EU-SILC | European Union Statistics on Income and Living Conditions 2011 | Statistical Office of the Republic of Slovenia | 28,747 |
| 2010 | Solomon Islands | 2012 | HIES | Household Income and Expenditure Survey 2012-2013 | Solomon Islands Statistics Office (SISO) - Ministry of Finance - Government of Solomon Islands | 25,110 |
| 2010 | South Africa | 2010 | IES | Income and Expenditure Survey 2010-2011 | Statistics South Africa | 95,042 |
| 2010 | South Sudan | 2009 | NBHS | National Baseline Household Survey 2009, First Round | Southern Sudan Center for Census, Statistics and Evaluation | 33,660 |
| 2010 | Spain | 2011 | EU-SILC | European Union Statistics on Income and Living Conditions 2011 | National Statistics Institute (INE-Spain) | 34,756 |
| 2010 | Sri Lanka | 2009 | HIES | Household Income and Expenditure Survey 2009-2010 | Department of Census and Statistics | 80,872 |
| 2010 | St. Lucia | 2015 | SLCHBS | Survey of Living Conditions and Household Budgets 2015-2016 | Central Statistical Office of Saint Lucia | 4,569 |
| 2010 | Sudan | 2009 | NBHS | National Baseline Household Survey 2009 | Central Bureau of Statistics (CBS), Southern Sudan Centre for Census Statistics and Evaluation (SSCCSE) | 48,822 |
| 2010 | Sweden | 2011 | EU-SILC | European Union Statistics on Income and Living Conditions 2011 | Statistics Sweden | 16,665 |
| 2010 | Switzerland | 2011 | EU-SILC | European Union Statistics on Income and Living Conditions 2011 | Swiss Federal Statistical Office | 17,602 |
| 2010 | São Tomé and Príncipe | 2010 | IOF | Inquérito Orçamento Familiar 2010 | Instituto Nacional de EstatÍsticas | 13,757 |
| 2010 | Taiwan, China | 2010 | FIDES-LIS | Survey of Family Income and Expenditure, Taiwan Area | Directorate General of Budget, Accounting and Statistics (DGBAS) | 47,900 |
| 2010 | Tajikistan | 2009 | TLSS | Living Standards Survey 2009 | Statistical Agency under President of the Republic of Tajikistan - TAJSTAT | 10,069 |
| 2010 | Tanzania | 2011 | HBS | Household Budget Survey 2011-2012 | National Bureau of Statistics (NBS) | 46,593 |
| 2010 | Thailand | 2010 | SES | Household Socio-Economic Survey and Village/Community Fund Survey 2010 | National Statistical Office, Social Statistics Bureau | 137,976 |
| 2010 | Timor-Leste | 2007 | TLSLS | Survey of Living Standards 2007 and Extension 2008 | National Statistics Directorate | 25,000 |
| 2010 | Togo | 2011 | QUIBB | Questionnaire des Indicateurs de Base du Bien-être 2011 | Direction Générale de la Statistique et de la Comptabilité Nationale | 29,676 |
| 2010 | Tonga | 2009 | HIES | Household Income and Expenditure Survey 2009 | Statistics Department - Government of The Kingdom of Tonga | 10,168 |
| 2010 | Tunisia | 2010 | NSHBCSL | Enquête Nationale sur le Budget, la Consommation et le Niveau de Vie des Ménages 2010 | Institut National de la Statistique - Ministère de la Planification et de la Coopération Internationale | 50,371 |
| 2010 | Tuvalu | 2010 | HIES | Household Income and Expenditure 2010 | Central Statistics Division - Ministry of Finance and Economic Development - Government of Tuvalu | 2,927 |
| 2010 | Türkiye | 2010 | HICES | Household Income and Consumption Expenditures Survey 2010 | Turkish Statistical Institute | 38,198 |
| 2010 | Uganda | 2009 | UNHS | National Household Survey 2009-2010 | Uganda Bureau of Statistics (UBOS) | 6,775 |
| 2010 | Ukraine | 2010 | HLCS | Household Living Conditions Survey 2010 | State Statistics Committee of Ukraine | 25,095 |
| 2010 | United Kingdom | 2010 | FRS-LIS | Family Resources Survey (FRS) | Department for Work and Pensions (DWP) | 57,928 |
| 2010 | United States | 2010 | CPS-ASEC-LIS | Current Population Survey – ASEC (Annual Social and Economic Supplement) | U.S. Census Bureau | 204,342 |
| 2010 | Uruguay | 2010 | ECH | Encuesta Continua de Hogares | Instituto Nacional de Estadãstica (INE) | 131,943 |
| 2010 | Uzbekistan | 2003 | HBS | Household Budget Survey 2003 | The State Committee of the Republic of Uzbekistan on Statistics | 49,307 |
| 2010 | Vanuatu | 2010 | HIES | Household Income and Expenditure Survey 2010 | Vanuatu National Statistics Office | 20,337 |
| 2010 | Viet Nam | 2010 | VHLSS | Vietnam Household Living Standards Survey 2010 | General Statistics Office (GSO) | 36,999 |
| 2010 | West Bank and Gaza | 2010 | PECS | Palestinian Expenditure and Consumption Survey 2010 | Palestinian Central Bureau of Statistics | 22,605 |
| 2010 | Yemen, Rep. | 2014 | HBS | Household Budget Survey 2014 | Central Statistical Organization of the Republic of Yemen | 67,178 |
| 2010 | Zambia | 2010 | LCMS-VI | Living Conditions Monitoring Survey VI 2010 | Central Statistical Office (CSO) | 19,376 |
| 2010 | Zimbabwe | 2017 | PICES | Poverty, Income, Consumption and Expenditure Survey 2017 | The Zimbabwe National Statistics Agency (ZIMSTAT) | 130,074 |
| 2021 | Albania | 2020 | HBS | Household Budget Survey 2020 | Institute of Statistics of Albania | 18,771 |
| 2021 | Angola | 2018 | IDREA | Inquérito Sobre Despesas, Receitas e Emprego 2018-2019 | Instituto Nacional de EstatÍstica (INE) | 60,504 |
| 2021 | Argentina | 2021 | EPHC-S2 | Encuesta Permanente de Hogares Continua - semestre II | Instituto Nacional de Estadãstica y Censos (INDEC) | 98,794 |
| 2021 | Armenia | 2021 | ILCS | Integrated Living Conditions Survey 2021 | National Statistical Service of the Republic of Armenia | 17,194 |
| 2021 | Australia | 2018 | SIH-LIS | Survey of Income and Housing Costs and Amenities | Australian Bureau of Statistics (ABS) | 33,439 |
| 2021 | Austria | 2021 | EU-SILC | European Union Statistics on Income and Living Conditions 2021 | Statistics Austria | 12,340 |
| 2021 | Azerbaijan | 2005 | HBS | Household Budget Survey 2005 | State Statistical Committee of the Republic of Azerbaijan | 32,875 |
| 2021 | Bangladesh | 2022 | HIES | Household Income and Expenditure Survey 2022 | Bangladesh Bureau of Statistics (BBS) | 61,849 |
| 2021 | Belarus | 2020 | HHS | Household Sample Survey 2020 | National Statistical Committee of the Republic of Belarus | 13,461 |
| 2021 | Belgium | 2021 | EU-SILC | European Union Statistics on Income and Living Conditions 2021 | Statistics Belgium - Statbel | 16,919 |
| 2021 | Benin | 2021 | EHCVM | Enquête Harmonisee sur les Conditions de Vie des Menages | Institut National de la Statistique et de l’Analyse Économique (INSAE) | 48,798 |
| 2021 | Bhutan | 2022 | BLSS | Living Standards Survey 2022 | National Statistics Bureau (NSB) | 52,822 |
| 2021 | Bolivia | 2021 | EH | Encuesta de Hogares 2021 | Instituto Nacional de Estadãstica | 41,984 |
| 2021 | Bosnia and Herzegovina | 2011 | HBS | Household Budget Survey 2011 | Bosnia and Herzegovina Agency for Statistics | 22,853 |
| 2021 | Botswana | 2015 | BMTHS | Multi-Topic Household Survey 2015 - 2016 | Statistics Botswana | 24,714 |
| 2021 | Brazil | 2021 | PNADC-E5 | Pesquisa Nacional por Amostra de Domicilios Continua - entrevista 5 | Instituto Brasileiro de Geografia e EstatÍstica | 334,253 |
| 2021 | Bulgaria | 2021 | EU-SILC | European Union Statistics on Income and Living Conditions 2021 | National Statistical Institute (NSI) | 17,249 |
| 2021 | Burkina Faso | 2021 | EHCVM | Enquête Harmonisee sur les Conditions de Vie des Menages | Institut National de la Statistique et de la Démographie | 47,090 |
| 2021 | Burundi | 2020 | EICVMB | Enquête intégrée sur les conditions de vie des ménages du Burundi (EICVMB, 2020-2021) | Institut de Statistiques et d’Études Économiques du Burundi (ISTEEBU) | 40,073 |
| 2021 | Cabo Verde | 2015 | IDRF | Inquérito às Despesas e Receitas Familiares 2014-2015 | Instituto Nacional de EstatÍstica de Cabo Verde | 24,395 |
| 2021 | Cameroon | 2021 | ECAM-V | Cinquième Enquête Camerounaise Auprès des Ménages 2021-2022 | Institut National de la Statistique | 49,244 |
| 2021 | Canada | 2019 | CIS-LIS | Canadian Income Survey (CIS) | Statistics Canada | 72,354 |
| 2021 | Central African Republic | 2021 | EHCVM | Enquête Harmonisée sur les Conditions de Vie des Ménages 2021 | Institut Centrafricain des Statistiques et des Etudes Economiques et Sociales, Ministère du plan, de l'Économie et de la Coopération internationale | 32,368 |
| 2021 | Chad | 2022 | EHCVM | Enquête Harmonisee sur les Conditions de Vie des Menages | Institut National de la Statistique, des Etudes Economiques et Démographiques (INSEED) | 45,060 |
| 2021 | Chile | 2022 | CASEN | Encuesta de Caracterización Socioeconómica Nacional en Pandemia | Ministerio de Desarrollo Social - Gobierno de Chile | 198,133 |
| 2021 | China | 2018 | CHIP | China Household Income Project | National Bureau of Statistics of China, National Bureau of Statistics | 71,266 |
| 2021 | Colombia | 2021 | GEIH | Gran Encuesta Integrada de Hogares 2021 | Departamento Administrativo Nacional de Estadistica (DANE) | 709,694 |
| 2021 | Comoros | 2013 | EESIC | Enquête sur l'Emploi, le Secteur Informel et la Consommation des Ménages aux Comores 2014 | Direction de la Statistique | 10,671 |
| 2021 | Congo, Dem. Rep. | 2020 | EGI-ODD | Enquête par Grappes à Indicateurs des ODD (EGI-ODD) | Observatoire Congolais du Développement Durable (OCDD) en collaboration avec Institut National de la Statistique (INS) | 52,199 |
| 2021 | Congo, Rep. | 2011 | ECOM | Enquête Congolaise Auprès des Ménages pour le Suivi et l'Évaluation de la Pauvreté 2011 | Centre National de la Statistique et des Études Économiques (CNSEE) | 44,736 |
| 2021 | Costa Rica | 2021 | ENAHO | Encuesta Nacional de Hogares 2021, Julio | Instituto Nacional de Estadãstica y Censos (INEC) | 31,918 |
| 2021 | Croatia | 2021 | EU-SILC | European Union Statistics on Income and Living Conditions 2021 | Croatian Bureau of Statistics - CBS | 19,331 |
| 2021 | Cyprus | 2021 | EU-SILC | European Union Statistics on Income and Living Conditions 2021 | The Statistical Service of Cyprus | 10,605 |
| 2021 | Czech Republic | 2021 | EU-SILC | European Union Statistics on Income and Living Conditions 2021 | Czech Statistical Office | 18,595 |
| 2021 | Côte d'Ivoire | 2021 | EHCVM | Enquête Harmonisee sur les Conditions de Vie des Menages | Institut National de la Statistique | 64,491 |
| 2021 | Denmark | 2021 | EU-SILC | European Union Statistics on Income and Living Conditions 2021 | Statistics Denmark | 15,629 |
| 2021 | Djibouti | 2017 | EDAM | Enquete Djiboutienne Aupres des Menages | Direction de la Statistique et des Etudes Demographiques | 21,489 |
| 2021 | Dominican Republic | 2021 | ECNFT-Q03 | Encuesta Nacional Continua de Fuerza de Trabajo - Trimestre III | Banco Central de la República Dominicana | 19,232 |
| 2021 | Ecuador | 2021 | ENEMDU | Encuesta de Empleo, Desempleo y Subempleo | Instituto Nacional de Estadãstica y Censo (INEC) | 29,841 |
| 2021 | Egypt, Arab Rep. | 2019 | HIECS | Household Income, Expenditure and Consumption Survey 2019 | Central Agency for Public Mobilization and Statistics (CAPMAS) | 45,200 |
| 2021 | El Salvador | 2021 | EHPM | Encuesta de Hogares de Propósitos Múltiples | Dirección General de Estadãstica y Censos (DIGESTYC) | 64,905 |
| 2021 | Estonia | 2021 | EU-SILC | European Union Statistics on Income and Living Conditions 2021 | Statistics Estonia | 15,143 |
| 2021 | Eswatini | 2016 | HIES | Household Income and Expenditure Survey 2016-2017 | Central Statistical Office | 14,410 |
| 2021 | Ethiopia | 2015 | HICES | Household Income, Consumption and Expenditure Survey 2015-2016 | Central Statistical Authority (CSA) - Ministry of Finance and Economic Development | 125,149 |
| 2021 | Fiji | 2019 | HIES | Household Income and Expenditure Survey 2019-2020 | Fiji Islands Bureau of Statistics (FIBoS) - Government of Fiji | 26,274 |
| 2021 | Finland | 2021 | EU-SILC | European Union Statistics on Income and Living Conditions 2021 | Statistics Finland | 22,360 |
| 2021 | France | 2021 | EU-SILC | European Union Statistics on Income and Living Conditions 2021 | INSEE - National Institute for Statistics and Economic Studies | 31,606 |
| 2021 | Gabon | 2017 | EGEP | Enquête Gabonaise pour l'Evaluation et le Suivi de la Pauvreté 2017 | Direction Générale de la Statistique et des Etudes Economiques (DGSEE) | 27,934 |
| 2021 | Gambia, The | 2020 | IHS | Integrated Household Survey 2020 | The Gambia Bureau of Statistics | 113,910 |
| 2021 | Georgia | 2021 | HIS | Household Integrated Survey 2021 | National Statistics Office of Georgia | 45,244 |
| 2021 | Germany | 2020 | GSOEP-LIS | German Social Economic Panel Study (GSOEP) | German Institute for Economic Research / Deutsches Institut für Wirtschaftsforschung (DIW) | 31,205 |
| 2021 | Ghana | 2016 | GLSS-VII | Ghana Living Standards Survey 7 | Ghana Statistical Service | 59,864 |
| 2021 | Greece | 2021 | EU-SILC | European Union Statistics on Income and Living Conditions 2021 | Hellenic Statistical Authority (ELSTAT) | 27,710 |
| 2021 | Grenada | 2018 | SLCHB | Survey of Living Conditions and Household Budgets 2018 | Central Statistics Office of Grenada | 2,256 |
| 2021 | Guatemala | 2014 | ENCOVI | Encuesta Nacional de Condiciones de Vida | Instituto Nacional de Estadãstica de Guatemala | 54,688 |
| 2021 | Guinea | 2018 | EHCVM | Enquête Harmonisee sur les Conditions de Vie des Menages | Institut National de la Statistique | 41,434 |
| 2021 | Guinea-Bissau | 2021 | EHCVM | Enquête Harmonisee sur les Conditions de Vie des Menages | Instituto Nacional de EstatÍstica e Censos (INEC) | 41,160 |
| 2021 | Haiti | 2012 | ECVMAS | Enquête sur les Conditions de Vie des Ménages après Séisme 2012 | Haitian Institute of Statistics and Information (IHSI) | 23,398 |
| 2021 | Honduras | 2019 | EPHPM | Encuesta Permanente de Hogares de Propósitos Múltiples | Instituto Nacional de Estadãstica de Honduras | 22,665 |
| 2021 | Hungary | 2021 | EU-SILC | European Union Statistics on Income and Living Conditions 2021 | Hungarian Central Statistical Office | 17,031 |
| 2021 | Iceland | 2018 | EU-SILC | European Union Statistics on Income and Living Conditions 2018 | Statistics Iceland | 8,652 |
| 2021 | India | 2021 | CPHS | Consumer Pyramid Household Survey | Centre for Monitoring Indian Economy | 608,262 |
| 2021 | Indonesia | 2021 | SUSENAS | National Socio-Economic Survey 2021 | Central Bureau of Statistics (BPS) of Indonesia | 1,277,497 |
| 2021 | Iran, Islamic Rep. | 2021 | HEIS | Households Income and Expenditure Survey 2021-2022 | Statistical Center of Iran | 128,913 |
| 2021 | Iraq | 2012 | IHSES | Household Socio-Economic Survey 2012 | Organization for Statistics and Information Technology (COSIT), Kurdistan Regional Statistics Office (KRSO) | 174,863 |
| 2021 | Ireland | 2021 | EU-SILC | European Union Statistics on Income and Living Conditions 2021 | Central Statistics Office Ireland | 12,291 |
| 2021 | Israel | 2021 | HES-LIS | Household Expenditure Survey | National Insurance Institute of Israel | 20,334 |
| 2021 | Italy | 2021 | EU-SILC | European Union Statistics on Income and Living Conditions 2021 | Italian National Institute of Statistics | 38,450 |
| 2021 | Jamaica | 2021 | JSLC | Jamaica Survey of Living Conditions 2021 | Statistical Institute of Jamaica | 6,200 |
| 2021 | Jordan | 2010 | HEIS | Household Expenditure and Income Survey 2010 | Department of Statistics (DoS) | 61,051 |
| 2021 | Kazakhstan | 2018 | HBS | Household Budget Survey 2018 | The Agency of Statistics of the Republic of Kazakhstan | 166,026 |
| 2021 | Kenya | 2021 | KCHS | Kenya Continuous Household Survey (KCHS) - 2021 | Kenya National Bureau of Statistics | 68,585 |
| 2021 | Kiribati | 2019 | HIES | Household Income and Expenditure Survey 2019-2020 | National Statistical Office | 12,481 |
| 2021 | Korea, Rep. | 2021 | SHFLC-LIS | The Survey of Household Finances and Living Conditions (SFLC) (South Korea) | Statistics Korea | 42,464 |
| 2021 | Kosovo | 2017 | HBS | Household Budget Survey 2017 | Kosovo Agency of Statistics | 11,364 |
| 2021 | Kyrgyz Republic | 2021 | KIHS | Kyrgyz Integrated Household Survey 2021 | National Statistical Committee of the Kyrgyz Republic | 76,655 |
| 2021 | Lao PDR | 2018 | LECS | Expenditure and Consumption Survey 2018-2019 | Lao Statistics Bureau | 41,103 |
| 2021 | Latvia | 2021 | EU-SILC | European Union Statistics on Income and Living Conditions 2021 | Central Statistical Bureau of Latvia | 13,998 |
| 2021 | Lebanon | 2011 | HBS | Household Budget Survey 2011-2012 | Central Administration for Statistics | 11,535 |
| 2021 | Lesotho | 2017 | CMSHBS | Continuous Multipurpose Household Survey/ Household Budget Survey 2017 - 2018 | Bureau of Statistics (BoS) - Ministry of Finsnce and development Planning | 17,288 |
| 2021 | Liberia | 2016 | HIES | Household Income and Expenditure Survey 2016 | Liberia Institute for Statistics and Geo-Information Services | 36,303 |
| 2021 | Lithuania | 2021 | EU-SILC | European Union Statistics on Income and Living Conditions 2021 | Statistics Lithuania | 12,118 |
| 2021 | Luxembourg | 2021 | EU-SILC | European Union Statistics on Income and Living Conditions 2021 | Luxembourg Institute of Socio-Economic Research (LISER) | 11,018 |
| 2021 | Madagascar | 2012 | ENSOMD | Enquête Nationale sur le Suivi des Objectifs du Millénaire pour le Développement 2012-2013 | Institut National de la Statistque, Office National de Nutrition | 77,560 |
| 2021 | Malawi | 2019 | IHS-V | Fifth Integrated Household Survey 2019-2020 | National Statistical Office (NSO) | 50,476 |
| 2021 | Malaysia | 2019 | HIESBA | Household Income, Expenditure and Basic Amenities Survey 2019 | Department of Statistics | 325,199 |
| 2021 | Maldives | 2019 | HIES | Household Income and Expenditure Survey 2019-2020 | Maldives National Bureau of Statistics | 24,845 |
| 2021 | Mali | 2021 | EHCVM | Enquête Harmonisee sur les Conditions de Vie des Menages | Direction Nationale de la Statistique et Information | 43,472 |
| 2021 | Malta | 2021 | EU-SILC | European Union Statistics on Income and Living Conditions 2021 | National Statistics Office - Malta | 10,110 |
| 2021 | Marshall Islands | 2019 | HIES | Household Income and Expenditure Survey 2019/2020 | National Statistical Office | 4,769 |
| 2021 | Mauritania | 2019 | EPCV | Enquête Permanente sur les Conditions de Vie des Ménages 2019-2020 | Office National de la Statistique | 60,594 |
| 2021 | Mauritius | 2017 | HBS | Household Budget Survey 2017 | Statistics Mauritius | 23,781 |
| 2021 | Mexico | 2022 | ENIGHNS | Encuesta Nacional de Ingresos y Gastos de los Hogares 2022 | Instituto Nacional de Estadãstica, Geografía e Informática (INEGI) | 304,495 |
| 2021 | Micronesia, Fed. Sts. | 2013 | HIES | Household Income and Expenditure Survey 2013 | Divison of Statistics - Office of Statistics, Budget and Economic Management, Overseas Development Assistance and Compact Management (SBOC) | 9,934 |
| 2021 | Moldova | 2021 | HBS | Household Budget Survey 2021 | National Bureau of Statistics of the Republic of Moldova | 9,515 |
| 2021 | Mongolia | 2022 | HSES | Household Socio Economic Survey 2022 | National Statistical Office | 78,299 |
| 2021 | Montenegro | 2022 | SILC-C | Survey on Income and Living Conditions 2022 | Statistical Office of Montenegro | 12,309 |
| 2021 | Morocco | 2013 | ENCDM | Enquete Nationale sur la Consommation et les DÃ©pense des Ménages 2013-2014 | Direction de la statistique | 75,691 |
| 2021 | Mozambique | 2019 | IOF | Inquérito sobre Orcamento Familiar 2019-2020 | Instituto Nacional de EstatÍstica | 13,307 |
| 2021 | Myanmar | 2017 | MLCS | Myanmar Living Conditions Survey 2017 | National Statistics Office, Myanmar | 60,357 |
| 2021 | Namibia | 2015 | NHIES | National Household Income and Expenditure Survey - NHIES | Central Bureau of Statistics National Planning Commission | 41,581 |
| 2021 | Nauru | 2012 | HIES | Household Income and Expenditure Survey 2012/2013 | Bureau of Statistics, Department of Finance | 3,150 |
| 2021 | Nepal | 2022 | LSS-IV | Living Standards Survey 2022-2023, Fourth Round | Central Bureau of Statistics | 38,101 |
| 2021 | Netherlands | 2021 | EU-SILC | European Union Statistics on Income and Living Conditions 2021 | Statistics Netherlands | 32,614 |
| 2021 | Nicaragua | 2014 | EMNV | Encuesta Nacional de Hogares sobre Medición de Nivel de Vida 2014 | Instituto Nacional de Información de Desarrollo | 29,073 |
| 2021 | Niger | 2021 | EHCVM | Enquête Harmonisee sur les Conditions de Vie des Menages | Survey and Census Division, National Institute of Statistics | 44,080 |
| 2021 | Nigeria | 2018 | LSS | Living Standards Survey 2018 | National Bureau of Statistics (NBS) | 112,564 |
| 2021 | North Macedonia | 2020 | SILC-C | Survey of Income and Living Conditions 2020 | State Statistical Office of the Republic of Macedonia | 16,801 |
| 2021 | Norway | 2020 | EU-SILC | European Union Statistics on Income and Living Conditions 2020 | Statistics Norway | 14,601 |
| 2021 | Pakistan | 2018 | HIES | Household Integrated Economic Survey (HIES) 2018-2019 | Pakistan Bureau of Statistics | 159,949 |
| 2021 | Panama | 2021 | EH | Encuesta de Hogares | Instituto Nacional de Estadãstica y Censos (INEC) | 38,570 |
| 2021 | Papua New Guinea | 2009 | HIES | Household Income and Expenditure Survey 2009-2010 | National Statistical Office | 20,369 |
| 2021 | Paraguay | 2021 | EPH | Encuesta Permanente de Hogares | Dirección General de Estadãstica, Encuestas y Censos | 16,457 |
| 2021 | Peru | 2021 | ENAHO | Encuesta Nacional de Hogares sobre Condiciones de Vida y Pobreza 2021 | Instituto Nacional de Estadãstica e Informática (INEI) | 114,023 |
| 2021 | Philippines | 2021 | FIES | Family Income and Expenditure Survey 2021 | Philippine Statistics Authority | 716,393 |
| 2021 | Poland | 2020 | EU-SILC | European Union Statistics on Income and Living Conditions 2020 | Central Statistical Office of Poland | 38,835 |
| 2021 | Portugal | 2021 | EU-SILC | European Union Statistics on Income and Living Conditions 2021 | Statistics Portugal | 26,822 |
| 2021 | Romania | 2021 | EU-SILC | European Union Statistics on Income and Living Conditions 2021 | National Institute of Statistics - NIS | 16,630 |
| 2021 | Russian Federation | 2020 | HBS | Household Budget Survey 2020 | Federal State Statistics Service of the Russian Federation | 450,293 |
| 2021 | Rwanda | 2016 | EICV-V | Integrated Household Living Conditions Survey 2016-2017 | National Institute of Statistics Rwanda (NISR) | 63,439 |
| 2021 | Samoa | 2013 | HIES | Household Income and Expenditure Survey 2013 | Bureau of Statistics - Government of Samoa | 16,134 |
| 2021 | Senegal | 2021 | EHCVM | Enquête Harmonisee sur les Conditions de Vie des Menages | Agence Nationale de la Statistique et de la Démographie | 63,530 |
| 2021 | Serbia | 2022 | EU-SILC | European Union Statistics on Income and Living Conditions 2022 | Statistical Office of the Republic of Serbia | 15,398 |
| 2021 | Seychelles | 2018 | HBS | Household Budget Survey 2018-2019 | National Bureau of Statistics | 7,129 |
| 2021 | Sierra Leone | 2018 | SLIHS | Integrated Household Survey 2018 | Statistics Sierra Leone, The World Bank | 40,462 |
| 2021 | Slovak Republic | 2020 | EU-SILC | European Union Statistics on Income and Living Conditions 2020 | Statistical Office of the Slovak Republic | 13,800 |
| 2021 | Slovenia | 2021 | EU-SILC | European Union Statistics on Income and Living Conditions 2021 | Statistical Office of the Republic of Slovenia | 19,677 |
| 2021 | Solomon Islands | 2012 | HIES | Household Income and Expenditure Survey 2012-2013 | Solomon Islands Statistics Office (SISO) - Ministry of Finance - Government of Solomon Islands | 25,110 |
| 2021 | South Africa | 2014 | LCS | Living Conditions Survey | Statistics South Africa | 88,906 |
| 2021 | South Sudan | 2016 | HFS-W3 | High Frequency Survey 2016, Wave 3 | Southern Sudan Center for Census, Statistics and Evaluation | 11,623 |
| 2021 | Spain | 2021 | EU-SILC | European Union Statistics on Income and Living Conditions 2021 | National Statistics Institute (INE-Spain) | 52,325 |
| 2021 | Sri Lanka | 2019 | HIES | Household Income and Expenditure Survey 2019 | Department of Census and Statistics (DCS) | 74,285 |
| 2021 | St. Lucia | 2015 | SLCHBS | Survey of Living Conditions and Household Budgets 2015-2016 | Central Statistical Office of Saint Lucia | 4,569 |
| 2021 | Sudan | 2014 | NBHS | National Baseline Household Survey 2014 | Central Bureau of Statistics (CBS) | 71,608 |
| 2021 | Suriname | 2022 | SSLC | Suriname Survey of Living Conditions 2022 | Inter American Development Bank | 7,713 |
| 2021 | Sweden | 2021 | EU-SILC | European Union Statistics on Income and Living Conditions 2021 | Statistics Sweden | 21,715 |
| 2021 | Switzerland | 2019 | EU-SILC | European Union Statistics on Income and Living Conditions 2019 | Swiss Federal Statistical Office | 16,662 |
| 2021 | São Tomé and Príncipe | 2017 | IOF | Inquerito Aos Orcamentos Familiares 2017 | Instituto Nacional de EstatÍstica | 11,614 |
| 2021 | Taiwan, China | 2021 | FIDES-LIS | Survey of Family Income and Expenditure, Taiwan Area | Directorate General of Budget, Accounting and Statistics (DGBAS) | 46,894 |
| 2021 | Tajikistan | 2015 | HSITAFIEN | Household Survey for the Purpose of Improvement, Targeting and Advancing the Formula of Indirect Estimates of Needs 2015 | Ministry of Health of Tajikistan, World Bank | 20,163 |
| 2021 | Tanzania | 2018 | HBS | Household Budget Survey 2017-2018 | National Bureau of Statistics (NBS) | 46,568 |
| 2021 | Thailand | 2021 | SES | Household Socio-Economic Survey 2021 | National Statistical Office of Thailand (NSO) | 130,580 |
| 2021 | Timor-Leste | 2014 | TLSLS | Timor-Leste Living Standards Survey 2014 | National Statistics Directorate | 32,079 |
| 2021 | Togo | 2021 | EHCVM | Enquête Harmonisee sur les Conditions de Vie des Menages | Institut National de la Statistique et des Etudes Economiques et Démographiques | 28,815 |
| 2021 | Tonga | 2021 | HIES | Household Income and Expenditure 2021 | Statistics Department - Government of The Kingdom of Tonga | 11,061 |
| 2021 | Tunisia | 2021 | NSHBCSL | Enquête Nationale sur le Budget, la Consommation et le Niveau de Vie des Ménages 2021 | Institut National de la Statistique - Ministère de la Planification et de la Coopération Internationale | 65,524 |
| 2021 | Tuvalu | 2010 | HIES | Household Income and Expenditure 2010 | Central Statistics Division - Ministry of Finance and Economic Development - Government of Tuvalu | 2,927 |
| 2021 | Türkiye | 2022 | SILC-C | Survey on Income and Living Conditions 2022 | Turkish Statistical Institute | 85,450 |
| 2021 | Uganda | 2019 | UNHS | National Household Survey 2019-2020 | Uganda Bureau of Statistics | 64,731 |
| 2021 | Ukraine | 2020 | HLCS | Household Living Conditions Survey 2020 | State Statistics Committee of Ukraine | 16,603 |
| 2021 | United Kingdom | 2021 | FRS-LIS | Family Resources Survey (FRS) | Department for Work and Pensions (DWP) | 34,590 |
| 2021 | United States | 2021 | CPS-ASEC-LIS | Current Population Survey - ASEC (Annual Social and Economic Supplement) | U.S. Census Bureau | 152,341 |
| 2021 | Uruguay | 2021 | ECH-S2 | Encuesta Continua de Hogares - semestre II | Instituto Nacional de Estadãstica (INE) | 28,308 |
| 2021 | Uzbekistan | 2022 | HBS | Household Budget Survey 2022 | The State Committee of the Republic of Uzbekistan on Statistics | 72,241 |
| 2021 | Vanuatu | 2019 | NSDP | Household Income and Expenditure Survey 2019-2020 | Vanuatu National Statistics Office | 19,000 |
| 2021 | Viet Nam | 2022 | VHLSS | Vietnam Household Living Standard Survey 2022 | General Statistics Office (GSO) | 34,498 |
| 2021 | West Bank and Gaza | 2016 | PECS | Palestinian Expenditure and Consumption Survey 2016 | Palestinian Central Bureau of Statistics | 20,185 |
| 2021 | Yemen, Rep. | 2014 | HBS | Household Budget Survey 2014 | Central Statistical Organization of the Republic of Yemen | 67,178 |
| 2021 | Zambia | 2022 | LCMS-VIII | Living Conditions Monitoring Survey VIII 2022 | Central Statistical Office (CSO) | 42,656 |
| 2021 | Zimbabwe | 2019 | PICES | Poverty, Income, Consumption and Expenditure Survey (mini) 2019 | The Zimbabwe National Statistics Agency (ZIMSTAT) | 9,877 |
